# Supplementary material for: Bonobo and chimpanzee gestures overlap extensively in meaning
Source: PLoS Biol. 2018 Feb 27;16(2):e2004825. doi: 10.1371/journal.pbio.2004825 (PMC5828348; doi:10.1371/journal.pbio.2004825)
Supplement: S2 Data — (XLSX) [file pbio.2004825.s002.xlsx]

## Sheet: Bonobo Raw
Goal	Gesture	Recipient
Acquire object/food	Rocking	Nao
Acquire object/food	Hand on	Pao
Acquire object/food	Hand on	Sala
Acquire object/food	Mouth stroke	Daniel
Acquire object/food	Mouth stroke	Gai
Acquire object/food	Mouth stroke	Hide
Acquire object/food	Mouth stroke	Hide
Acquire object/food	Mouth stroke	Hoshi
Acquire object/food	Mouth stroke	Hoshi
Acquire object/food	Mouth stroke	Hoshi
Acquire object/food	Mouth stroke	Ichi
Acquire object/food	Mouth stroke	Kabo
Acquire object/food	Mouth stroke	Kabo
Acquire object/food	Mouth stroke	Kabo
Acquire object/food	Mouth stroke	Kabo
Acquire object/food	Mouth stroke	Kabo
Acquire object/food	Mouth stroke	Kabo
Acquire object/food	Mouth stroke	Loboko
Acquire object/food	Mouth stroke	Maluta
Acquire object/food	Mouth stroke	Maluta
Acquire object/food	Mouth stroke	Marie
Acquire object/food	Mouth stroke	Nadir
Acquire object/food	Mouth stroke	Nobita
Acquire object/food	Mouth stroke	Nobita
Acquire object/food	Mouth stroke	Nobita
Acquire object/food	Mouth stroke	Pao
Acquire object/food	Mouth stroke	Pao
Acquire object/food	Mouth stroke	Pao
Acquire object/food	Mouth stroke	Pao
Acquire object/food	Mouth stroke	Pao
Acquire object/food	Mouth stroke	Pao
Acquire object/food	Mouth stroke	Sala
Acquire object/food	Mouth stroke	Sala
Acquire object/food	Mouth stroke	Sala
Acquire object/food	Mouth stroke	Sala
Acquire object/food	Mouth stroke	Sala
Acquire object/food	Mouth stroke	Snare
Acquire object/food	Mouth stroke	Snare
Acquire object/food	Mouth stroke	Snare
Acquire object/food	Mouth stroke	Snare
Acquire object/food	Mouth stroke	Snare
Acquire object/food	Mouth stroke	Turkey
Acquire object/food	Reach	Kabo
Acquire object/food	Reach	Nao
Acquire object/food	Reach	Pao
Acquire object/food	Reach	Pao
Acquire object/food	Reach	Pao
Acquire object/food	Reach	Sala
Acquire object/food	Reach	Sala
Acquire object/food	Touch other	Nobita
Climb on - me	Arm-up	Fua
Climb on - me	Arm-up	Jolie
Climb on - me	Arm-up	Jolie
Climb on - me	Arm-up	Jolie
Climb on - me	Arm-up	Natsuko
Climb on - me	Arm raise	Jolie
Climb on - me	Arm raise	Kale
Climb on - me	Arm raise	Natsuko
Climb on - me	Arm raise	Seko
Climb on - me	Arm swing	Hachiro
Climb on - me	Arm swing	Hachiro
Climb on - me	Arm swing	Hideo
Climb on - me	Arm swing	Hideo
Climb on - me	Arm swing	Hideo
Climb on - me	Arm swing	Jolie
Climb on - me	Arm swing	Seko
Climb on - me	Beckon	Fua
Climb on - me	Beckon	Hachiro
Climb on - me	Beckon	Natsuko
Climb on - me	Beckon	Otoko
Climb on - me	Beckon	Seko
Climb on - me	Beckon	Seko
Climb on - me	Big Loud Scratch	Kalin
Climb on - me	Big Loud Scratch	Natsuko
Climb on - me	Bite	Hideo
Climb on - me	Directed push	Fua
Climb on - me	Directed push	Hachiro
Climb on - me	Directed push	Hachiro
Climb on - me	Directed push	Hachiro
Climb on - me	Directed push	Hachiro
Climb on - me	Directed push	Hachiro
Climb on - me	Directed push	Hachiro
Climb on - me	Directed push	Hachiro
Climb on - me	Directed push	Hachiro
Climb on - me	Directed push	Hachiro
Climb on - me	Directed push	Hachiro
Climb on - me	Directed push	Hachiro
Climb on - me	Directed push	Hachiro
Climb on - me	Directed push	Hachiro
Climb on - me	Directed push	Hachiro
Climb on - me	Directed push	Hachiro
Climb on - me	Directed push	Hachiro
Climb on - me	Directed push	Hachiro
Climb on - me	Directed push	Hachiro
Climb on - me	Directed push	Hachiro
Climb on - me	Directed push	Hachiro
Climb on - me	Directed push	Hachiro
Climb on - me	Directed push	Hachiro
Climb on - me	Directed push	Hide
Climb on - me	Directed push	Isao
Climb on - me	Directed push	Isao
Climb on - me	Directed push	Jolie
Climb on - me	Directed push	Jolie
Climb on - me	Directed push	Jolie
Climb on - me	Directed push	Jolie
Climb on - me	Directed push	Jolie
Climb on - me	Directed push	Jolie
Climb on - me	Directed push	Jolie
Climb on - me	Directed push	Kale
Climb on - me	Directed push	Mazy
Climb on - me	Directed push	Nimba
Climb on - me	Directed push	Otoko
Climb on - me	Directed push	Otoko
Climb on - me	Directed push	Otoko
Climb on - me	Directed push	Otoko
Climb on - me	Directed push	Pukka
Climb on - me	Directed push	Seko
Climb on - me	Directed push	Seko
Climb on - me	Directed push	Seko
Climb on - me	Directed push	Seko
Climb on - me	Directed push	Seko
Climb on - me	Foot present	Seko
Climb on - me	Grab	Fua
Climb on - me	Grab	Hachiro
Climb on - me	Grab	Hachiro
Climb on - me	Grab	Hachiro
Climb on - me	Grab	Hideo
Climb on - me	Grab	Jolie
Climb on - me	Grab	Jolie
Climb on - me	Grab	Otoko
Climb on - me	Grab	Seko
Climb on - me	Grab	Seko
Climb on - me	Grab-pull	Hachiro
Climb on - me	Grab-pull	Hachiro
Climb on - me	Grab-pull	Isao
Climb on - me	Grab-pull	Natsuko
Climb on - me	Grab-pull	Natsuko
Climb on - me	Grab-pull	Otoko
Climb on - me	Grab-pull	Seko
Climb on - me	Grab-pull	Seko
Climb on - me	Hand on	Kalin
Climb on - me	Present (climb on)	Fua
Climb on - me	Present (climb on)	Fua
Climb on - me	Present (climb on)	Fua
Climb on - me	Present (climb on)	Fua
Climb on - me	Present (climb on)	Fua
Climb on - me	Present (climb on)	Hachiro
Climb on - me	Present (climb on)	Hachiro
Climb on - me	Present (climb on)	Hideo
Climb on - me	Present (climb on)	Hideo
Climb on - me	Present (climb on)	Hideo
Climb on - me	Present (climb on)	Hideo
Climb on - me	Present (climb on)	Hideo
Climb on - me	Present (climb on)	Isao
Climb on - me	Present (climb on)	Jolie
Climb on - me	Present (climb on)	Jolie
Climb on - me	Present (climb on)	Jolie
Climb on - me	Present (climb on)	Jolie
Climb on - me	Present (climb on)	Jolie
Climb on - me	Present (climb on)	Jolie
Climb on - me	Present (climb on)	Jolie
Climb on - me	Present (climb on)	Kale
Climb on - me	Present (climb on)	Kale
Climb on - me	Present (climb on)	Kale
Climb on - me	Present (climb on)	Kale
Climb on - me	Present (climb on)	Marina
Climb on - me	Present (climb on)	Natsuko
Climb on - me	Present (climb on)	Natsuko
Climb on - me	Present (climb on)	Natsuko
Climb on - me	Present (climb on)	Natsuko
Climb on - me	Present (climb on)	Otoko
Climb on - me	Present (climb on)	Otoko
Climb on - me	Present (climb on)	Otoko
Climb on - me	Present (climb on)	Pukka
Climb on - me	Present (climb on)	Sato
Climb on - me	Present (climb on)	Seko
Climb on - me	Present (climb on)	Seko
Climb on - me	Present (climb on)	Seko
Climb on - me	Present (climb on)	Seko
Climb on - me	Present (climb on)	Seko
Climb on - me	Present (climb on)	Seko
Climb on - me	Present (climb on)	Seko
Climb on - me	Present (climb on)	Seko
Climb on - me	Present (climb on)	Seko
Climb on - me	Reach	Fua
Climb on - me	Reach	Fua
Climb on - me	Reach	Fua
Climb on - me	Reach	Hachiro
Climb on - me	Reach	Kale
Climb on - me	Reach	Kale
Climb on - me	Reach	Kale
Climb on - me	Reach	Kale
Climb on - me	Reach	Kale
Climb on - me	Reach	Kalin
Climb on - me	Reach	Kalin
Climb on - me	Reach	Mazy
Climb on - me	Reach	Natsuko
Climb on - me	Reach	Natsuko
Climb on - me	Reach	Natsuko
Climb on - me	Reach	Sato
Climb on - me	Reach	Seko
Climb on - me	Reach	Seko
Climb on - me	Reach	Seko
Climb on - me	Tap other	Seko
Climb on - me	Tap other	Seko
Climb on - me	Touch other	Fua
Climb on - me	Touch other	Hachiro
Climb on - me	Touch other	Hachiro
Climb on - me	Touch other	Hachiro
Climb on - me	Touch other	Hachiro
Climb on - me	Touch other	Hachiro
Climb on - me	Touch other	Hachiro
Climb on - me	Touch other	Hachiro
Climb on - me	Touch other	Hachiro
Climb on - me	Touch other	Hachiro
Climb on - me	Touch other	Hachiro
Climb on - me	Touch other	Hachiro
Climb on - me	Touch other	Hachiro
Climb on - me	Touch other	Hideo
Climb on - me	Touch other	Hideo
Climb on - me	Touch other	Jolie
Climb on - me	Touch other	Jolie
Climb on - me	Touch other	Natsuko
Climb on - me	Touch other	Otoko
Climb on - me	Touch other	Otoko
Climb on - me	Touch other	Seko
Climb on - you	Bipedal rocking	Jacky
Climb on - you	Bipedal stance	Jacky
Climb on - you	Bipedal stance	Jacky
Climb on - you	Bipedal stance	Nao
Climb on - you	Stroking	Sala
Climb on - you	Arm raise	Hoshi
Climb on - you	Arm raise	Hoshi
Climb on - you	Arm raise	Hoshi
Climb on - you	Arm raise	Hoshi
Climb on - you	Arm raise	Hoshi
Climb on - you	Arm raise	Hoshi
Climb on - you	Arm raise	Hoshi
Climb on - you	Arm raise	Hoshi
Climb on - you	Arm raise	Hoshi
Climb on - you	Arm raise	Hoshi
Climb on - you	Arm raise	Jacky
Climb on - you	Arm raise	Jacky
Climb on - you	Arm raise	Jacky
Climb on - you	Arm raise	Jacky
Climb on - you	Arm raise	Sala
Climb on - you	Hand on	Jacky
Climb on - you	Hand on	Nao
Climb on - you	Hand on	Natsuko
Climb on - you	Reach	Hide
Climb on - you	Reach	Kabo
Climb on - you	Reach	Nao
Climb on - you	Reach	Nova
Climb on - you	Reach	Saku
Climb on - you	Reach	Sala
Climb on - you	Reach	Sala
Climb on - you	Touch other	Jacky
Climb on - you	Touch other	Kabo
Contact	Arm-up	Hachiro
Contact	Arm-up	Hachiro
Contact	Arm-up	Hachiro
Contact	Arm-up	Hideo
Contact	Arm-up	Jolie
Contact	Arm-up	Jolie
Contact	Arm-up	Jolie
Contact	Arm-up	Jolie
Contact	Arm-up	Kale
Contact	Arm-up	Kalin
Contact	Arm-up	Natsuko
Contact	Arm-up	Natsuko
Contact	Arm-up	Natsuko
Contact	Arm-up	Natsuko
Contact	Arm-up	Natsuko
Contact	Arm-up	Sato
Contact	Bipedal rocking	Fuku
Contact	Bipedal rocking	Gauche
Contact	Bipedal rocking	Tawashi
Contact	Bipedal stance	Jiro
Contact	Bipedal stance	Kiyota
Contact	Bipedal stance	Nobita
Contact	Rocking	Hoshi
Contact	Rocking	Hoshi
Contact	Rocking	Nao
Contact	Arm raise	Hoshi
Contact	Arm raise	Jacky
Contact	Arm raise	Jacky
Contact	Arm raise	Nao
Contact	Arm swing	Kabo
Contact	Arm swing	Kabo
Contact	Arm swing	Maluta
Contact	Arm wave	Hide
Contact	Bite	Natsuko
Contact	Bite	Natsuko
Contact	Directed push	Hachiro
Contact	Directed push	Natsuko
Contact	Embrace	Fuku
Contact	Embrace	Hachiro
Contact	Embrace	Hachiro
Contact	Embrace	Isao
Contact	Embrace	Kiku
Contact	Embrace	Natsuko
Contact	Embrace	Natsuko
Contact	Embrace	Natsuko
Contact	Embrace	Natsuko
Contact	Embrace	Nobita
Contact	Embrace	Seko
Contact	Embrace	Seko
Contact	Grab	Hideo
Contact	Grab	Natsuko
Contact	Grab	Natsuko
Contact	Hand fling	Kitaro
Contact	Hand on	Hachiro
Contact	Hand on	Kale
Contact	Hand on	Natsuko
Contact	Hand on	Natsuko
Contact	Hand on	Natsuko
Contact	Hand on	Sala
Contact	Hand on	Sala
Contact	Head butt	Daniel
Contact	Leg swing	Hide
Contact	Object move	Kabo
Contact	Object move	Kabo
Contact	Object shake	Sala
Contact	Present (climb on)	Jolie
Contact	Present (genitals backward)	Gai
Contact	Present (genitals backward)	Gai
Contact	Present (genitals backward)	Gauche
Contact	Present (genitals backward)	Hide
Contact	Present (genitals backward)	Jiro
Contact	Present (genitals backward)	Kiku
Contact	Present (genitals backward)	Kitaro
Contact	Present (genitals backward)	Kitaro
Contact	Present (genitals backward)	Nobita
Contact	Present (genitals backward)	Nobita
Contact	Present (genitals backward)	Tawashi
Contact	Reach	Hachiro
Contact	Roll over	Hoshi
Contact	Roll over	Hoshi
Contact	Roll over	Nao
Contact	Rump rub	Gai
Contact	Stomp	Sala
Contact	Tandem walk	Kiku
Contact	Tandem walk	Nao
Follow me	Beckon	Otomi
Follow me	Beckon	Otomi
Follow me	Foot present	Loboko
Follow me	Grab-pull	Fua
Follow me	Grab-pull	Fuku
Follow me	Grab-pull	Hachiro
Follow me	Grab-pull	Hachiro
Follow me	Grab-pull	Hideo
Follow me	Grab-pull	Hoshi
Follow me	Grab-pull	Hoshi
Follow me	Grab-pull	Ichiko
Follow me	Grab-pull	Ichiko
Follow me	Grab-pull	Ichiko
Follow me	Grab-pull	Ikura
Follow me	Grab-pull	Jeudi
Follow me	Grab-pull	Jeudi
Follow me	Grab-pull	Jo
Follow me	Grab-pull	Jo
Follow me	Grab-pull	Kiku
Follow me	Grab-pull	Kitaro
Follow me	Grab-pull	Kitaro
Follow me	Grab-pull	Kitaro
Follow me	Grab-pull	Kitaro
Follow me	Grab-pull	Kitaro
Follow me	Grab-pull	Kitaro
Follow me	Grab-pull	Kiyota
Follow me	Grab-pull	Kiyota
Follow me	Grab-pull	Kiyota
Follow me	Grab-pull	Kiyota
Follow me	Grab-pull	Kiyota
Follow me	Grab-pull	Kiyota
Follow me	Grab-pull	Maluta
Follow me	Grab-pull	Maluta
Follow me	Grab-pull	Michio
Follow me	Grab-pull	Michio
Follow me	Grab-pull	Nadir
Follow me	Grab-pull	Nao
Follow me	Grab-pull	Nao
Follow me	Grab-pull	Natsuko
Follow me	Grab-pull	Natsuko
Follow me	Grab-pull	Natsuko
Follow me	Grab-pull	Nobita
Follow me	Grab-pull	Nobita
Follow me	Grab-pull	Nobita
Follow me	Grab-pull	Nova
Follow me	Grab-pull	Otoko
Follow me	Grab-pull	Sachi
Follow me	Grab-pull	Sala
Follow me	Grab-pull	Tawashi
Follow me	Grab-pull	Tawashi
Follow me	Grab-pull	Tawashi
Follow me	Grab-pull	Ten
Follow me	Grab-pull	Turkey
Follow me	Grab-pull	Turkey
Follow me	Grab-pull	Yuki
Follow me	Grab-pull	Yuki
Follow me	Grab-pull	Yume
Follow me	Grab-pull	Yume
Follow me	Grab-pull	Yume
Follow me	Grab-pull	Zina
Follow me	Hand on	Maluta
Follow me	Hand on	Nobita
Follow me	Hand on	Sala
Follow me	Present (grooming)	Ikura
Initiate grooming	Rocking	Loboko
Initiate grooming	Rocking	Pipi
Initiate grooming	Stroking	Nobita
Initiate grooming	Arm raise	Dai
Initiate grooming	Arm raise	Dai
Initiate grooming	Arm raise	Daniel
Initiate grooming	Arm raise	Gauche
Initiate grooming	Arm raise	Hide
Initiate grooming	Arm raise	Hide
Initiate grooming	Arm raise	Hoshi
Initiate grooming	Arm raise	Hoshi
Initiate grooming	Arm raise	Hoshi
Initiate grooming	Arm raise	Ichi
Initiate grooming	Arm raise	Jacky
Initiate grooming	Arm raise	Jacky
Initiate grooming	Arm raise	Jo
Initiate grooming	Arm raise	Kabo
Initiate grooming	Arm raise	Kiku
Initiate grooming	Arm raise	Kiku
Initiate grooming	Arm raise	Kitaro
Initiate grooming	Arm raise	Kitaro
Initiate grooming	Arm raise	Maluta
Initiate grooming	Arm raise	Nao
Initiate grooming	Arm raise	Nao
Initiate grooming	Arm raise	Nao
Initiate grooming	Arm raise	Nara
Initiate grooming	Arm raise	Nobita
Initiate grooming	Arm raise	Nova
Initiate grooming	Arm swing	Jacky
Initiate grooming	Beckon	Snare
Initiate grooming	Beckon	Zina
Initiate grooming	Big Loud Scratch	Ana
Initiate grooming	Big Loud Scratch	Dai
Initiate grooming	Big Loud Scratch	Dai
Initiate grooming	Big Loud Scratch	Fuku
Initiate grooming	Big Loud Scratch	Hide
Initiate grooming	Big Loud Scratch	Hide
Initiate grooming	Big Loud Scratch	Hide
Initiate grooming	Big Loud Scratch	Hide
Initiate grooming	Big Loud Scratch	Hide
Initiate grooming	Big Loud Scratch	Hide
Initiate grooming	Big Loud Scratch	Hideko
Initiate grooming	Big Loud Scratch	Hideko
Initiate grooming	Big Loud Scratch	Hoshi
Initiate grooming	Big Loud Scratch	Hoshi
Initiate grooming	Big Loud Scratch	Hoshi
Initiate grooming	Big Loud Scratch	Hoshi
Initiate grooming	Big Loud Scratch	Ichi
Initiate grooming	Big Loud Scratch	Ichi
Initiate grooming	Big Loud Scratch	Ichi
Initiate grooming	Big Loud Scratch	Jacky
Initiate grooming	Big Loud Scratch	Jacky
Initiate grooming	Big Loud Scratch	Jacky
Initiate grooming	Big Loud Scratch	Jacky
Initiate grooming	Big Loud Scratch	Jacky
Initiate grooming	Big Loud Scratch	Jeudi
Initiate grooming	Big Loud Scratch	Jo
Initiate grooming	Big Loud Scratch	Jo
Initiate grooming	Big Loud Scratch	Jo
Initiate grooming	Big Loud Scratch	Jo
Initiate grooming	Big Loud Scratch	Jo
Initiate grooming	Big Loud Scratch	Kabo
Initiate grooming	Big Loud Scratch	Kabo
Initiate grooming	Big Loud Scratch	Kabo
Initiate grooming	Big Loud Scratch	Kabo
Initiate grooming	Big Loud Scratch	Kitaro
Initiate grooming	Big Loud Scratch	Kitaro
Initiate grooming	Big Loud Scratch	Loboko
Initiate grooming	Big Loud Scratch	Loboko
Initiate grooming	Big Loud Scratch	Loboko
Initiate grooming	Big Loud Scratch	Loboko
Initiate grooming	Big Loud Scratch	Loboko
Initiate grooming	Big Loud Scratch	Malusu
Initiate grooming	Big Loud Scratch	Marie
Initiate grooming	Big Loud Scratch	Marie
Initiate grooming	Big Loud Scratch	Marie
Initiate grooming	Big Loud Scratch	Marie
Initiate grooming	Big Loud Scratch	Nao
Initiate grooming	Big Loud Scratch	Nao
Initiate grooming	Big Loud Scratch	Nao
Initiate grooming	Big Loud Scratch	Nao
Initiate grooming	Big Loud Scratch	Nara
Initiate grooming	Big Loud Scratch	Nova
Initiate grooming	Big Loud Scratch	Nova
Initiate grooming	Big Loud Scratch	Otomi
Initiate grooming	Big Loud Scratch	Pao
Initiate grooming	Big Loud Scratch	Pipi
Initiate grooming	Big Loud Scratch	Pipi
Initiate grooming	Big Loud Scratch	Sachi
Initiate grooming	Big Loud Scratch	Sachi
Initiate grooming	Big Loud Scratch	Saku
Initiate grooming	Big Loud Scratch	Shiba
Initiate grooming	Big Loud Scratch	Shiba
Initiate grooming	Big Loud Scratch	Tawashi
Initiate grooming	Big Loud Scratch	Turkey
Initiate grooming	Big Loud Scratch	Yuki
Initiate grooming	Big Loud Scratch	Yuki
Initiate grooming	Big Loud Scratch	Yume
Initiate grooming	Directed push	Zina
Initiate grooming	Embrace	Ichiko
Initiate grooming	Foot present	Ichi
Initiate grooming	Grab	Fuku
Initiate grooming	Grab	Fuku
Initiate grooming	Grab	Isao
Initiate grooming	Grab	Nobita
Initiate grooming	Grab	Yume
Initiate grooming	Grab-pull	Jo
Initiate grooming	Grab-pull	Kabo
Initiate grooming	Grab-pull	Marie
Initiate grooming	Grab-pull	Sachi
Initiate grooming	Hand fling	Nobita
Initiate grooming	Hand on	Ichi
Initiate grooming	Hand on	Ichi
Initiate grooming	Hand on	Nobita
Initiate grooming	Hand on	Sala
Initiate grooming	Head rock	Zina
Initiate grooming	Object shake	Ichi
Initiate grooming	Object shake	Ichi
Initiate grooming	Object shake	Ichi
Initiate grooming	Object shake	Ichi
Initiate grooming	Present (genitals forward)	Pao
Initiate grooming	Present (grooming)	Ana
Initiate grooming	Present (grooming)	Ana
Initiate grooming	Present (grooming)	Ana
Initiate grooming	Present (grooming)	Dai
Initiate grooming	Present (grooming)	Dai
Initiate grooming	Present (grooming)	Dai
Initiate grooming	Present (grooming)	Dai
Initiate grooming	Present (grooming)	Dai
Initiate grooming	Present (grooming)	Dai
Initiate grooming	Present (grooming)	Dai
Initiate grooming	Present (grooming)	Dai
Initiate grooming	Present (grooming)	Dai
Initiate grooming	Present (grooming)	Dai
Initiate grooming	Present (grooming)	Dai
Initiate grooming	Present (grooming)	Daniel
Initiate grooming	Present (grooming)	Daniel
Initiate grooming	Present (grooming)	Daniel
Initiate grooming	Present (grooming)	Daniel
Initiate grooming	Present (grooming)	Daniel
Initiate grooming	Present (grooming)	Daniel
Initiate grooming	Present (grooming)	Daniel
Initiate grooming	Present (grooming)	Daniel
Initiate grooming	Present (grooming)	Daniel
Initiate grooming	Present (grooming)	Daniel
Initiate grooming	Present (grooming)	Daniel
Initiate grooming	Present (grooming)	Daniel
Initiate grooming	Present (grooming)	Fua
Initiate grooming	Present (grooming)	Fuku
Initiate grooming	Present (grooming)	Fuku
Initiate grooming	Present (grooming)	Fuku
Initiate grooming	Present (grooming)	Fuku
Initiate grooming	Present (grooming)	Fuku
Initiate grooming	Present (grooming)	Fuku
Initiate grooming	Present (grooming)	Fuku
Initiate grooming	Present (grooming)	Fuku
Initiate grooming	Present (grooming)	Fuku
Initiate grooming	Present (grooming)	Fuku
Initiate grooming	Present (grooming)	Fuku
Initiate grooming	Present (grooming)	Fuku
Initiate grooming	Present (grooming)	Fuku
Initiate grooming	Present (grooming)	Fuku
Initiate grooming	Present (grooming)	Fuku
Initiate grooming	Present (grooming)	Fuku
Initiate grooming	Present (grooming)	Fuku
Initiate grooming	Present (grooming)	Fuku
Initiate grooming	Present (grooming)	Fuku
Initiate grooming	Present (grooming)	Fuku
Initiate grooming	Present (grooming)	Fuku
Initiate grooming	Present (grooming)	Fuku
Initiate grooming	Present (grooming)	Fuku
Initiate grooming	Present (grooming)	Fuku
Initiate grooming	Present (grooming)	Fuku
Initiate grooming	Present (grooming)	Fuku
Initiate grooming	Present (grooming)	Fuku
Initiate grooming	Present (grooming)	Fuku
Initiate grooming	Present (grooming)	Fuku
Initiate grooming	Present (grooming)	Fuku
Initiate grooming	Present (grooming)	Fuku
Initiate grooming	Present (grooming)	Fuku
Initiate grooming	Present (grooming)	Fuku
Initiate grooming	Present (grooming)	Fuku
Initiate grooming	Present (grooming)	Fuku
Initiate grooming	Present (grooming)	Fuku
Initiate grooming	Present (grooming)	Fuku
Initiate grooming	Present (grooming)	Fuku
Initiate grooming	Present (grooming)	Fuku
Initiate grooming	Present (grooming)	Fuku
Initiate grooming	Present (grooming)	Fuku
Initiate grooming	Present (grooming)	Fuku
Initiate grooming	Present (grooming)	Gai
Initiate grooming	Present (grooming)	Gai
Initiate grooming	Present (grooming)	Gai
Initiate grooming	Present (grooming)	Gai
Initiate grooming	Present (grooming)	Gai
Initiate grooming	Present (grooming)	Gauche
Initiate grooming	Present (grooming)	Gauche
Initiate grooming	Present (grooming)	Gauche
Initiate grooming	Present (grooming)	Gauche
Initiate grooming	Present (grooming)	Gauche
Initiate grooming	Present (grooming)	Gauche
Initiate grooming	Present (grooming)	Gauche
Initiate grooming	Present (grooming)	Hachiro
Initiate grooming	Present (grooming)	Hachiro
Initiate grooming	Present (grooming)	Hachiro
Initiate grooming	Present (grooming)	Hachiro
Initiate grooming	Present (grooming)	Hachiro
Initiate grooming	Present (grooming)	Hachiro
Initiate grooming	Present (grooming)	Hide
Initiate grooming	Present (grooming)	Hide
Initiate grooming	Present (grooming)	Hide
Initiate grooming	Present (grooming)	Hide
Initiate grooming	Present (grooming)	Hide
Initiate grooming	Present (grooming)	Hide
Initiate grooming	Present (grooming)	Hide
Initiate grooming	Present (grooming)	Hide
Initiate grooming	Present (grooming)	Hide
Initiate grooming	Present (grooming)	Hide
Initiate grooming	Present (grooming)	Hide
Initiate grooming	Present (grooming)	Hide
Initiate grooming	Present (grooming)	Hide
Initiate grooming	Present (grooming)	Hide
Initiate grooming	Present (grooming)	Hide
Initiate grooming	Present (grooming)	Hide
Initiate grooming	Present (grooming)	Hide
Initiate grooming	Present (grooming)	Hide
Initiate grooming	Present (grooming)	Hide
Initiate grooming	Present (grooming)	Hide
Initiate grooming	Present (grooming)	Hide
Initiate grooming	Present (grooming)	Hide
Initiate grooming	Present (grooming)	Hide
Initiate grooming	Present (grooming)	Hide
Initiate grooming	Present (grooming)	Hide
Initiate grooming	Present (grooming)	Hide
Initiate grooming	Present (grooming)	Hide
Initiate grooming	Present (grooming)	Hide
Initiate grooming	Present (grooming)	Hide
Initiate grooming	Present (grooming)	Hide
Initiate grooming	Present (grooming)	Hide
Initiate grooming	Present (grooming)	Hide
Initiate grooming	Present (grooming)	Hide
Initiate grooming	Present (grooming)	Hide
Initiate grooming	Present (grooming)	Hide
Initiate grooming	Present (grooming)	Hide
Initiate grooming	Present (grooming)	Hide
Initiate grooming	Present (grooming)	Hide
Initiate grooming	Present (grooming)	Hide
Initiate grooming	Present (grooming)	Hide
Initiate grooming	Present (grooming)	Hide
Initiate grooming	Present (grooming)	Hide
Initiate grooming	Present (grooming)	Hide
Initiate grooming	Present (grooming)	Hide
Initiate grooming	Present (grooming)	Hideko
Initiate grooming	Present (grooming)	Hideko
Initiate grooming	Present (grooming)	Hideko
Initiate grooming	Present (grooming)	Hideko
Initiate grooming	Present (grooming)	Hideko
Initiate grooming	Present (grooming)	Hideo
Initiate grooming	Present (grooming)	Hideo
Initiate grooming	Present (grooming)	Hoshi
Initiate grooming	Present (grooming)	Hoshi
Initiate grooming	Present (grooming)	Hoshi
Initiate grooming	Present (grooming)	Hoshi
Initiate grooming	Present (grooming)	Hoshi
Initiate grooming	Present (grooming)	Hoshi
Initiate grooming	Present (grooming)	Hoshi
Initiate grooming	Present (grooming)	Hoshi
Initiate grooming	Present (grooming)	Hoshi
Initiate grooming	Present (grooming)	Hoshi
Initiate grooming	Present (grooming)	Hoshi
Initiate grooming	Present (grooming)	Hoshi
Initiate grooming	Present (grooming)	Hoshi
Initiate grooming	Present (grooming)	Hoshi
Initiate grooming	Present (grooming)	Hoshi
Initiate grooming	Present (grooming)	Hoshi
Initiate grooming	Present (grooming)	Hoshi
Initiate grooming	Present (grooming)	Hoshi
Initiate grooming	Present (grooming)	Hoshi
Initiate grooming	Present (grooming)	Hoshi
Initiate grooming	Present (grooming)	Hoshi
Initiate grooming	Present (grooming)	Hoshi
Initiate grooming	Present (grooming)	Hoshi
Initiate grooming	Present (grooming)	Hoshi
Initiate grooming	Present (grooming)	Hoshi
Initiate grooming	Present (grooming)	Hoshi
Initiate grooming	Present (grooming)	Hoshi
Initiate grooming	Present (grooming)	Hoshi
Initiate grooming	Present (grooming)	Hoshi
Initiate grooming	Present (grooming)	Hoshi
Initiate grooming	Present (grooming)	Hoshi
Initiate grooming	Present (grooming)	Hoshi
Initiate grooming	Present (grooming)	Hoshi
Initiate grooming	Present (grooming)	Hoshi
Initiate grooming	Present (grooming)	Hoshi
Initiate grooming	Present (grooming)	Hoshi
Initiate grooming	Present (grooming)	Hoshi
Initiate grooming	Present (grooming)	Hoshi
Initiate grooming	Present (grooming)	Hoshi
Initiate grooming	Present (grooming)	Hoshi
Initiate grooming	Present (grooming)	Hoshi
Initiate grooming	Present (grooming)	Hoshi
Initiate grooming	Present (grooming)	Hoshi
Initiate grooming	Present (grooming)	Hoshi
Initiate grooming	Present (grooming)	Hoshi
Initiate grooming	Present (grooming)	Hoshi
Initiate grooming	Present (grooming)	Hoshi
Initiate grooming	Present (grooming)	Hoshi
Initiate grooming	Present (grooming)	Ichi
Initiate grooming	Present (grooming)	Ichi
Initiate grooming	Present (grooming)	Ichi
Initiate grooming	Present (grooming)	Ichi
Initiate grooming	Present (grooming)	Ichi
Initiate grooming	Present (grooming)	Ichi
Initiate grooming	Present (grooming)	Ichi
Initiate grooming	Present (grooming)	Ichi
Initiate grooming	Present (grooming)	Ichi
Initiate grooming	Present (grooming)	Ichi
Initiate grooming	Present (grooming)	Ichi
Initiate grooming	Present (grooming)	Ichi
Initiate grooming	Present (grooming)	Ichi
Initiate grooming	Present (grooming)	Ichi
Initiate grooming	Present (grooming)	Ichi
Initiate grooming	Present (grooming)	Ichi
Initiate grooming	Present (grooming)	Ichi
Initiate grooming	Present (grooming)	Ichi
Initiate grooming	Present (grooming)	Ichi
Initiate grooming	Present (grooming)	Ichi
Initiate grooming	Present (grooming)	Ichi
Initiate grooming	Present (grooming)	Ichi
Initiate grooming	Present (grooming)	Ichi
Initiate grooming	Present (grooming)	Ichi
Initiate grooming	Present (grooming)	Ichi
Initiate grooming	Present (grooming)	Ichi
Initiate grooming	Present (grooming)	Ichi
Initiate grooming	Present (grooming)	Ichi
Initiate grooming	Present (grooming)	Ichi
Initiate grooming	Present (grooming)	Ichi
Initiate grooming	Present (grooming)	Ichi
Initiate grooming	Present (grooming)	Ichi
Initiate grooming	Present (grooming)	Ichi
Initiate grooming	Present (grooming)	Ichi
Initiate grooming	Present (grooming)	Ichi
Initiate grooming	Present (grooming)	Ichi
Initiate grooming	Present (grooming)	Ichi
Initiate grooming	Present (grooming)	Ichi
Initiate grooming	Present (grooming)	Ichiko
Initiate grooming	Present (grooming)	Ichiko
Initiate grooming	Present (grooming)	Ichiko
Initiate grooming	Present (grooming)	Ichiko
Initiate grooming	Present (grooming)	Ichiko
Initiate grooming	Present (grooming)	Ichiko
Initiate grooming	Present (grooming)	Ichiko
Initiate grooming	Present (grooming)	Ichiko
Initiate grooming	Present (grooming)	Ichiko
Initiate grooming	Present (grooming)	Ichiko
Initiate grooming	Present (grooming)	Ichiko
Initiate grooming	Present (grooming)	Ichiko
Initiate grooming	Present (grooming)	Ikura
Initiate grooming	Present (grooming)	Ikura
Initiate grooming	Present (grooming)	Ikura
Initiate grooming	Present (grooming)	Ikura
Initiate grooming	Present (grooming)	Ikura
Initiate grooming	Present (grooming)	Ikura
Initiate grooming	Present (grooming)	Ikura
Initiate grooming	Present (grooming)	Ikura
Initiate grooming	Present (grooming)	Ikura
Initiate grooming	Present (grooming)	Ikura
Initiate grooming	Present (grooming)	Ikura
Initiate grooming	Present (grooming)	Jacky
Initiate grooming	Present (grooming)	Jacky
Initiate grooming	Present (grooming)	Jacky
Initiate grooming	Present (grooming)	Jacky
Initiate grooming	Present (grooming)	Jacky
Initiate grooming	Present (grooming)	Jacky
Initiate grooming	Present (grooming)	Jacky
Initiate grooming	Present (grooming)	Jacky
Initiate grooming	Present (grooming)	Jacky
Initiate grooming	Present (grooming)	Jacky
Initiate grooming	Present (grooming)	Jacky
Initiate grooming	Present (grooming)	Jacky
Initiate grooming	Present (grooming)	Jacky
Initiate grooming	Present (grooming)	Jacky
Initiate grooming	Present (grooming)	Jacky
Initiate grooming	Present (grooming)	Jacky
Initiate grooming	Present (grooming)	Jacky
Initiate grooming	Present (grooming)	Jacky
Initiate grooming	Present (grooming)	Jacky
Initiate grooming	Present (grooming)	Jacky
Initiate grooming	Present (grooming)	Jacky
Initiate grooming	Present (grooming)	Jacky
Initiate grooming	Present (grooming)	Jacky
Initiate grooming	Present (grooming)	Jacky
Initiate grooming	Present (grooming)	Jacky
Initiate grooming	Present (grooming)	Jacky
Initiate grooming	Present (grooming)	Jacky
Initiate grooming	Present (grooming)	Jacky
Initiate grooming	Present (grooming)	Jacky
Initiate grooming	Present (grooming)	Jacky
Initiate grooming	Present (grooming)	Jacky
Initiate grooming	Present (grooming)	Jacky
Initiate grooming	Present (grooming)	Jacky
Initiate grooming	Present (grooming)	Jacky
Initiate grooming	Present (grooming)	Jacky
Initiate grooming	Present (grooming)	Jacky
Initiate grooming	Present (grooming)	Jacky
Initiate grooming	Present (grooming)	Jacky
Initiate grooming	Present (grooming)	Jacky
Initiate grooming	Present (grooming)	Jacky
Initiate grooming	Present (grooming)	Jacky
Initiate grooming	Present (grooming)	Jacky
Initiate grooming	Present (grooming)	Jacky
Initiate grooming	Present (grooming)	Jacky
Initiate grooming	Present (grooming)	Jacky
Initiate grooming	Present (grooming)	Jacky
Initiate grooming	Present (grooming)	Jacky
Initiate grooming	Present (grooming)	Jacky
Initiate grooming	Present (grooming)	Jacky
Initiate grooming	Present (grooming)	Jacky
Initiate grooming	Present (grooming)	Jacky
Initiate grooming	Present (grooming)	Jacky
Initiate grooming	Present (grooming)	Jacky
Initiate grooming	Present (grooming)	Jacky
Initiate grooming	Present (grooming)	Jacky
Initiate grooming	Present (grooming)	Jacky
Initiate grooming	Present (grooming)	Jacky
Initiate grooming	Present (grooming)	Jacky
Initiate grooming	Present (grooming)	Jacky
Initiate grooming	Present (grooming)	Jacky
Initiate grooming	Present (grooming)	Jacky
Initiate grooming	Present (grooming)	Jeudi
Initiate grooming	Present (grooming)	Jeudi
Initiate grooming	Present (grooming)	Jeudi
Initiate grooming	Present (grooming)	Jeudi
Initiate grooming	Present (grooming)	Jeudi
Initiate grooming	Present (grooming)	Jeudi
Initiate grooming	Present (grooming)	Jeudi
Initiate grooming	Present (grooming)	Jeudi
Initiate grooming	Present (grooming)	Jeudi
Initiate grooming	Present (grooming)	Jeudi
Initiate grooming	Present (grooming)	Jeudi
Initiate grooming	Present (grooming)	Jeudi
Initiate grooming	Present (grooming)	Jeudi
Initiate grooming	Present (grooming)	Jeudi
Initiate grooming	Present (grooming)	Jeudi
Initiate grooming	Present (grooming)	Jeudi
Initiate grooming	Present (grooming)	Jeudi
Initiate grooming	Present (grooming)	Jeudi
Initiate grooming	Present (grooming)	Jeudi
Initiate grooming	Present (grooming)	Jeudi
Initiate grooming	Present (grooming)	Jeudi
Initiate grooming	Present (grooming)	Jeudi
Initiate grooming	Present (grooming)	Jeudi
Initiate grooming	Present (grooming)	Jeudi
Initiate grooming	Present (grooming)	Jeudi
Initiate grooming	Present (grooming)	Jeudi
Initiate grooming	Present (grooming)	Jiro
Initiate grooming	Present (grooming)	Jiro
Initiate grooming	Present (grooming)	Jiro
Initiate grooming	Present (grooming)	Jiro
Initiate grooming	Present (grooming)	Jiro
Initiate grooming	Present (grooming)	Jiro
Initiate grooming	Present (grooming)	Jiro
Initiate grooming	Present (grooming)	Jiro
Initiate grooming	Present (grooming)	Jiro
Initiate grooming	Present (grooming)	Jiro
Initiate grooming	Present (grooming)	Jo
Initiate grooming	Present (grooming)	Jo
Initiate grooming	Present (grooming)	Jo
Initiate grooming	Present (grooming)	Jo
Initiate grooming	Present (grooming)	Jo
Initiate grooming	Present (grooming)	Jo
Initiate grooming	Present (grooming)	Jo
Initiate grooming	Present (grooming)	Jo
Initiate grooming	Present (grooming)	Jo
Initiate grooming	Present (grooming)	Jo
Initiate grooming	Present (grooming)	Jo
Initiate grooming	Present (grooming)	Jo
Initiate grooming	Present (grooming)	Jo
Initiate grooming	Present (grooming)	Jo
Initiate grooming	Present (grooming)	Jo
Initiate grooming	Present (grooming)	Jo
Initiate grooming	Present (grooming)	Jo
Initiate grooming	Present (grooming)	Jo
Initiate grooming	Present (grooming)	Jo
Initiate grooming	Present (grooming)	Jo
Initiate grooming	Present (grooming)	Jo
Initiate grooming	Present (grooming)	Jo
Initiate grooming	Present (grooming)	Jo
Initiate grooming	Present (grooming)	Jo
Initiate grooming	Present (grooming)	Jo
Initiate grooming	Present (grooming)	Kabo
Initiate grooming	Present (grooming)	Kabo
Initiate grooming	Present (grooming)	Kabo
Initiate grooming	Present (grooming)	Kabo
Initiate grooming	Present (grooming)	Kabo
Initiate grooming	Present (grooming)	Kabo
Initiate grooming	Present (grooming)	Kabo
Initiate grooming	Present (grooming)	Kabo
Initiate grooming	Present (grooming)	Kabo
Initiate grooming	Present (grooming)	Kabo
Initiate grooming	Present (grooming)	Kabo
Initiate grooming	Present (grooming)	Kabo
Initiate grooming	Present (grooming)	Kabo
Initiate grooming	Present (grooming)	Kabo
Initiate grooming	Present (grooming)	Kabo
Initiate grooming	Present (grooming)	Kabo
Initiate grooming	Present (grooming)	Kabo
Initiate grooming	Present (grooming)	Kabo
Initiate grooming	Present (grooming)	Kabo
Initiate grooming	Present (grooming)	Kabo
Initiate grooming	Present (grooming)	Kabo
Initiate grooming	Present (grooming)	Kabo
Initiate grooming	Present (grooming)	Kabo
Initiate grooming	Present (grooming)	Kabo
Initiate grooming	Present (grooming)	Kabo
Initiate grooming	Present (grooming)	Kabo
Initiate grooming	Present (grooming)	Kabo
Initiate grooming	Present (grooming)	Kabo
Initiate grooming	Present (grooming)	Kabo
Initiate grooming	Present (grooming)	Kabo
Initiate grooming	Present (grooming)	Kabo
Initiate grooming	Present (grooming)	Kabo
Initiate grooming	Present (grooming)	Kabo
Initiate grooming	Present (grooming)	Kabo
Initiate grooming	Present (grooming)	Kabo
Initiate grooming	Present (grooming)	Kabo
Initiate grooming	Present (grooming)	Kabo
Initiate grooming	Present (grooming)	Kabo
Initiate grooming	Present (grooming)	Kabo
Initiate grooming	Present (grooming)	Kabo
Initiate grooming	Present (grooming)	Kabo
Initiate grooming	Present (grooming)	Kabo
Initiate grooming	Present (grooming)	Kabo
Initiate grooming	Present (grooming)	Kabo
Initiate grooming	Present (grooming)	Kabo
Initiate grooming	Present (grooming)	Kabo
Initiate grooming	Present (grooming)	Kabo
Initiate grooming	Present (grooming)	Kabo
Initiate grooming	Present (grooming)	Kabo
Initiate grooming	Present (grooming)	Kabo
Initiate grooming	Present (grooming)	Kabo
Initiate grooming	Present (grooming)	Kabo
Initiate grooming	Present (grooming)	Kabo
Initiate grooming	Present (grooming)	Kabo
Initiate grooming	Present (grooming)	Kabo
Initiate grooming	Present (grooming)	Kabo
Initiate grooming	Present (grooming)	Kabo
Initiate grooming	Present (grooming)	Kabo
Initiate grooming	Present (grooming)	Kabo
Initiate grooming	Present (grooming)	Kabo
Initiate grooming	Present (grooming)	Kabo
Initiate grooming	Present (grooming)	Kabo
Initiate grooming	Present (grooming)	Kabo
Initiate grooming	Present (grooming)	Kabo
Initiate grooming	Present (grooming)	Kabo
Initiate grooming	Present (grooming)	Kabo
Initiate grooming	Present (grooming)	Kabo
Initiate grooming	Present (grooming)	Kabo
Initiate grooming	Present (grooming)	Kabo
Initiate grooming	Present (grooming)	Kabo
Initiate grooming	Present (grooming)	Kabo
Initiate grooming	Present (grooming)	Kabo
Initiate grooming	Present (grooming)	Kabo
Initiate grooming	Present (grooming)	Kabo
Initiate grooming	Present (grooming)	Kabo
Initiate grooming	Present (grooming)	Kabo
Initiate grooming	Present (grooming)	Kabo
Initiate grooming	Present (grooming)	Kabo
Initiate grooming	Present (grooming)	Kabo
Initiate grooming	Present (grooming)	Kaboko
Initiate grooming	Present (grooming)	Kaboko
Initiate grooming	Present (grooming)	Kale
Initiate grooming	Present (grooming)	Kiku
Initiate grooming	Present (grooming)	Kiku
Initiate grooming	Present (grooming)	Kiku
Initiate grooming	Present (grooming)	Kiku
Initiate grooming	Present (grooming)	Kiku
Initiate grooming	Present (grooming)	Kiku
Initiate grooming	Present (grooming)	Kiku
Initiate grooming	Present (grooming)	Kiku
Initiate grooming	Present (grooming)	Kiku
Initiate grooming	Present (grooming)	Kiku
Initiate grooming	Present (grooming)	Kiku
Initiate grooming	Present (grooming)	Kiku
Initiate grooming	Present (grooming)	Kiku
Initiate grooming	Present (grooming)	Kiku
Initiate grooming	Present (grooming)	Kiku
Initiate grooming	Present (grooming)	Kiku
Initiate grooming	Present (grooming)	Kiku
Initiate grooming	Present (grooming)	Kiku
Initiate grooming	Present (grooming)	Kiku
Initiate grooming	Present (grooming)	Kiku
Initiate grooming	Present (grooming)	Kiku
Initiate grooming	Present (grooming)	Kiku
Initiate grooming	Present (grooming)	Kiku
Initiate grooming	Present (grooming)	Kiku
Initiate grooming	Present (grooming)	Kiku
Initiate grooming	Present (grooming)	Kiku
Initiate grooming	Present (grooming)	Kiku
Initiate grooming	Present (grooming)	Kiku
Initiate grooming	Present (grooming)	Kiku
Initiate grooming	Present (grooming)	Kiku
Initiate grooming	Present (grooming)	Kiku
Initiate grooming	Present (grooming)	Kiku
Initiate grooming	Present (grooming)	Kiku
Initiate grooming	Present (grooming)	Kiku
Initiate grooming	Present (grooming)	Kiku
Initiate grooming	Present (grooming)	Kiku
Initiate grooming	Present (grooming)	Kiku
Initiate grooming	Present (grooming)	Kiku
Initiate grooming	Present (grooming)	Kiku
Initiate grooming	Present (grooming)	Kitaro
Initiate grooming	Present (grooming)	Kitaro
Initiate grooming	Present (grooming)	Kitaro
Initiate grooming	Present (grooming)	Kitaro
Initiate grooming	Present (grooming)	Kitaro
Initiate grooming	Present (grooming)	Kitaro
Initiate grooming	Present (grooming)	Kitaro
Initiate grooming	Present (grooming)	Kitaro
Initiate grooming	Present (grooming)	Kitaro
Initiate grooming	Present (grooming)	Kitaro
Initiate grooming	Present (grooming)	Kitaro
Initiate grooming	Present (grooming)	Kitaro
Initiate grooming	Present (grooming)	Kitaro
Initiate grooming	Present (grooming)	Kitaro
Initiate grooming	Present (grooming)	Kitaro
Initiate grooming	Present (grooming)	Kitaro
Initiate grooming	Present (grooming)	Kitaro
Initiate grooming	Present (grooming)	Kitaro
Initiate grooming	Present (grooming)	Kitaro
Initiate grooming	Present (grooming)	Kitaro
Initiate grooming	Present (grooming)	Kitaro
Initiate grooming	Present (grooming)	Kitaro
Initiate grooming	Present (grooming)	Kitaro
Initiate grooming	Present (grooming)	Kitaro
Initiate grooming	Present (grooming)	Kitaro
Initiate grooming	Present (grooming)	Kitaro
Initiate grooming	Present (grooming)	Kitaro
Initiate grooming	Present (grooming)	Kitaro
Initiate grooming	Present (grooming)	Kitaro
Initiate grooming	Present (grooming)	Kitaro
Initiate grooming	Present (grooming)	Kitaro
Initiate grooming	Present (grooming)	Kitaro
Initiate grooming	Present (grooming)	Kitaro
Initiate grooming	Present (grooming)	Kitaro
Initiate grooming	Present (grooming)	Kitaro
Initiate grooming	Present (grooming)	Kitaro
Initiate grooming	Present (grooming)	Kitaro
Initiate grooming	Present (grooming)	Kitaro
Initiate grooming	Present (grooming)	Kitaro
Initiate grooming	Present (grooming)	Kitaro
Initiate grooming	Present (grooming)	Kitaro
Initiate grooming	Present (grooming)	Kiyota
Initiate grooming	Present (grooming)	Kiyota
Initiate grooming	Present (grooming)	Kiyota
Initiate grooming	Present (grooming)	Kiyota
Initiate grooming	Present (grooming)	Loboko
Initiate grooming	Present (grooming)	Loboko
Initiate grooming	Present (grooming)	Loboko
Initiate grooming	Present (grooming)	Loboko
Initiate grooming	Present (grooming)	Loboko
Initiate grooming	Present (grooming)	Loboko
Initiate grooming	Present (grooming)	Loboko
Initiate grooming	Present (grooming)	Loboko
Initiate grooming	Present (grooming)	Loboko
Initiate grooming	Present (grooming)	Loboko
Initiate grooming	Present (grooming)	Loboko
Initiate grooming	Present (grooming)	Loboko
Initiate grooming	Present (grooming)	Loboko
Initiate grooming	Present (grooming)	Loboko
Initiate grooming	Present (grooming)	Loboko
Initiate grooming	Present (grooming)	Loboko
Initiate grooming	Present (grooming)	Loboko
Initiate grooming	Present (grooming)	Loboko
Initiate grooming	Present (grooming)	Loboko
Initiate grooming	Present (grooming)	Loboko
Initiate grooming	Present (grooming)	Loboko
Initiate grooming	Present (grooming)	Loboko
Initiate grooming	Present (grooming)	Loboko
Initiate grooming	Present (grooming)	Loboko
Initiate grooming	Present (grooming)	Loboko
Initiate grooming	Present (grooming)	Loboko
Initiate grooming	Present (grooming)	Loboko
Initiate grooming	Present (grooming)	Loboko
Initiate grooming	Present (grooming)	Loboko
Initiate grooming	Present (grooming)	Loboko
Initiate grooming	Present (grooming)	Loboko
Initiate grooming	Present (grooming)	Loboko
Initiate grooming	Present (grooming)	Loboko
Initiate grooming	Present (grooming)	Loboko
Initiate grooming	Present (grooming)	Loboko
Initiate grooming	Present (grooming)	Loboko
Initiate grooming	Present (grooming)	Loboko
Initiate grooming	Present (grooming)	Loboko
Initiate grooming	Present (grooming)	Loboko
Initiate grooming	Present (grooming)	Loboko
Initiate grooming	Present (grooming)	Loboko
Initiate grooming	Present (grooming)	Malusu
Initiate grooming	Present (grooming)	Malusu
Initiate grooming	Present (grooming)	Malusu
Initiate grooming	Present (grooming)	Malusu
Initiate grooming	Present (grooming)	Malusu
Initiate grooming	Present (grooming)	Malusu
Initiate grooming	Present (grooming)	Malusu
Initiate grooming	Present (grooming)	Malusu
Initiate grooming	Present (grooming)	Malusu
Initiate grooming	Present (grooming)	Malusu
Initiate grooming	Present (grooming)	Malusu
Initiate grooming	Present (grooming)	Malusu
Initiate grooming	Present (grooming)	Malusu
Initiate grooming	Present (grooming)	Malusu
Initiate grooming	Present (grooming)	Malusu
Initiate grooming	Present (grooming)	Malusu
Initiate grooming	Present (grooming)	Malusu
Initiate grooming	Present (grooming)	Malusu
Initiate grooming	Present (grooming)	Malusu
Initiate grooming	Present (grooming)	Malusu
Initiate grooming	Present (grooming)	Malusu
Initiate grooming	Present (grooming)	Malusu
Initiate grooming	Present (grooming)	Malusu
Initiate grooming	Present (grooming)	Malusu
Initiate grooming	Present (grooming)	Malusu
Initiate grooming	Present (grooming)	Maluta
Initiate grooming	Present (grooming)	Maluta
Initiate grooming	Present (grooming)	Maluta
Initiate grooming	Present (grooming)	Maluta
Initiate grooming	Present (grooming)	Maluta
Initiate grooming	Present (grooming)	Maluta
Initiate grooming	Present (grooming)	Maluta
Initiate grooming	Present (grooming)	Maluta
Initiate grooming	Present (grooming)	Maluta
Initiate grooming	Present (grooming)	Maluta
Initiate grooming	Present (grooming)	Maluta
Initiate grooming	Present (grooming)	Maluta
Initiate grooming	Present (grooming)	Maluta
Initiate grooming	Present (grooming)	Maluta
Initiate grooming	Present (grooming)	Maluta
Initiate grooming	Present (grooming)	Maluta
Initiate grooming	Present (grooming)	Maluta
Initiate grooming	Present (grooming)	Maluta
Initiate grooming	Present (grooming)	Maluta
Initiate grooming	Present (grooming)	Maluta
Initiate grooming	Present (grooming)	Maluta
Initiate grooming	Present (grooming)	Maluta
Initiate grooming	Present (grooming)	Maluta
Initiate grooming	Present (grooming)	Maluta
Initiate grooming	Present (grooming)	Maluta
Initiate grooming	Present (grooming)	Maluta
Initiate grooming	Present (grooming)	Maluta
Initiate grooming	Present (grooming)	Maluta
Initiate grooming	Present (grooming)	Maluta
Initiate grooming	Present (grooming)	Maluta
Initiate grooming	Present (grooming)	Maluta
Initiate grooming	Present (grooming)	Maluta
Initiate grooming	Present (grooming)	Maluta
Initiate grooming	Present (grooming)	Maluta
Initiate grooming	Present (grooming)	Maluta
Initiate grooming	Present (grooming)	Maluta
Initiate grooming	Present (grooming)	Maluta
Initiate grooming	Present (grooming)	Maluta
Initiate grooming	Present (grooming)	Maluta
Initiate grooming	Present (grooming)	Maluta
Initiate grooming	Present (grooming)	Maluta
Initiate grooming	Present (grooming)	Maluta
Initiate grooming	Present (grooming)	Maluta
Initiate grooming	Present (grooming)	Maluta
Initiate grooming	Present (grooming)	Maluta
Initiate grooming	Present (grooming)	Maluta
Initiate grooming	Present (grooming)	Marie
Initiate grooming	Present (grooming)	Marie
Initiate grooming	Present (grooming)	Marie
Initiate grooming	Present (grooming)	Marie
Initiate grooming	Present (grooming)	Marie
Initiate grooming	Present (grooming)	Marie
Initiate grooming	Present (grooming)	Marie
Initiate grooming	Present (grooming)	Marie
Initiate grooming	Present (grooming)	Marie
Initiate grooming	Present (grooming)	Marie
Initiate grooming	Present (grooming)	Marie
Initiate grooming	Present (grooming)	Marie
Initiate grooming	Present (grooming)	Marie
Initiate grooming	Present (grooming)	Marie
Initiate grooming	Present (grooming)	Marie
Initiate grooming	Present (grooming)	Marie
Initiate grooming	Present (grooming)	Marie
Initiate grooming	Present (grooming)	Marie
Initiate grooming	Present (grooming)	Marie
Initiate grooming	Present (grooming)	Marie
Initiate grooming	Present (grooming)	Marie
Initiate grooming	Present (grooming)	Marie
Initiate grooming	Present (grooming)	Marie
Initiate grooming	Present (grooming)	Marie
Initiate grooming	Present (grooming)	Marie
Initiate grooming	Present (grooming)	Marie
Initiate grooming	Present (grooming)	Marie
Initiate grooming	Present (grooming)	Marie
Initiate grooming	Present (grooming)	Marie
Initiate grooming	Present (grooming)	Michio
Initiate grooming	Present (grooming)	Michio
Initiate grooming	Present (grooming)	Michio
Initiate grooming	Present (grooming)	Michio
Initiate grooming	Present (grooming)	Michio
Initiate grooming	Present (grooming)	Michio
Initiate grooming	Present (grooming)	Nadir
Initiate grooming	Present (grooming)	Nadir
Initiate grooming	Present (grooming)	Nadir
Initiate grooming	Present (grooming)	Nadir
Initiate grooming	Present (grooming)	Nao
Initiate grooming	Present (grooming)	Nao
Initiate grooming	Present (grooming)	Nao
Initiate grooming	Present (grooming)	Nao
Initiate grooming	Present (grooming)	Nao
Initiate grooming	Present (grooming)	Nao
Initiate grooming	Present (grooming)	Nao
Initiate grooming	Present (grooming)	Nao
Initiate grooming	Present (grooming)	Nao
Initiate grooming	Present (grooming)	Nao
Initiate grooming	Present (grooming)	Nao
Initiate grooming	Present (grooming)	Nao
Initiate grooming	Present (grooming)	Nao
Initiate grooming	Present (grooming)	Nao
Initiate grooming	Present (grooming)	Nara
Initiate grooming	Present (grooming)	Nara
Initiate grooming	Present (grooming)	Nara
Initiate grooming	Present (grooming)	Nara
Initiate grooming	Present (grooming)	Nara
Initiate grooming	Present (grooming)	Nara
Initiate grooming	Present (grooming)	Nara
Initiate grooming	Present (grooming)	Nara
Initiate grooming	Present (grooming)	Nara
Initiate grooming	Present (grooming)	Nara
Initiate grooming	Present (grooming)	Nara
Initiate grooming	Present (grooming)	Nara
Initiate grooming	Present (grooming)	Nara
Initiate grooming	Present (grooming)	Nara
Initiate grooming	Present (grooming)	Nara
Initiate grooming	Present (grooming)	Nara
Initiate grooming	Present (grooming)	Nara
Initiate grooming	Present (grooming)	Nara
Initiate grooming	Present (grooming)	Nara
Initiate grooming	Present (grooming)	Nara
Initiate grooming	Present (grooming)	Nara
Initiate grooming	Present (grooming)	Nara
Initiate grooming	Present (grooming)	Nara
Initiate grooming	Present (grooming)	Nara
Initiate grooming	Present (grooming)	Nara
Initiate grooming	Present (grooming)	Nara
Initiate grooming	Present (grooming)	Nara
Initiate grooming	Present (grooming)	Nara
Initiate grooming	Present (grooming)	Nara
Initiate grooming	Present (grooming)	Nara
Initiate grooming	Present (grooming)	Nara
Initiate grooming	Present (grooming)	Natsuko
Initiate grooming	Present (grooming)	Natsuko
Initiate grooming	Present (grooming)	Natsuko
Initiate grooming	Present (grooming)	Natsuko
Initiate grooming	Present (grooming)	Natsuko
Initiate grooming	Present (grooming)	Nobita
Initiate grooming	Present (grooming)	Nobita
Initiate grooming	Present (grooming)	Nobita
Initiate grooming	Present (grooming)	Nobita
Initiate grooming	Present (grooming)	Nobita
Initiate grooming	Present (grooming)	Nobita
Initiate grooming	Present (grooming)	Nobita
Initiate grooming	Present (grooming)	Nobita
Initiate grooming	Present (grooming)	Nobita
Initiate grooming	Present (grooming)	Nobita
Initiate grooming	Present (grooming)	Nobita
Initiate grooming	Present (grooming)	Nobita
Initiate grooming	Present (grooming)	Nobita
Initiate grooming	Present (grooming)	Nobita
Initiate grooming	Present (grooming)	Nobita
Initiate grooming	Present (grooming)	Nobita
Initiate grooming	Present (grooming)	Nobita
Initiate grooming	Present (grooming)	Nobita
Initiate grooming	Present (grooming)	Nova
Initiate grooming	Present (grooming)	Nova
Initiate grooming	Present (grooming)	Nova
Initiate grooming	Present (grooming)	Nova
Initiate grooming	Present (grooming)	Nova
Initiate grooming	Present (grooming)	Nova
Initiate grooming	Present (grooming)	Nova
Initiate grooming	Present (grooming)	Nova
Initiate grooming	Present (grooming)	Nova
Initiate grooming	Present (grooming)	Nova
Initiate grooming	Present (grooming)	Nova
Initiate grooming	Present (grooming)	Nova
Initiate grooming	Present (grooming)	Nova
Initiate grooming	Present (grooming)	Nova
Initiate grooming	Present (grooming)	Nova
Initiate grooming	Present (grooming)	Nova
Initiate grooming	Present (grooming)	Nova
Initiate grooming	Present (grooming)	Nova
Initiate grooming	Present (grooming)	Nova
Initiate grooming	Present (grooming)	Nova
Initiate grooming	Present (grooming)	Nova
Initiate grooming	Present (grooming)	Nova
Initiate grooming	Present (grooming)	Nova
Initiate grooming	Present (grooming)	Nova
Initiate grooming	Present (grooming)	Nova
Initiate grooming	Present (grooming)	Nova
Initiate grooming	Present (grooming)	Nova
Initiate grooming	Present (grooming)	Nova
Initiate grooming	Present (grooming)	Nova
Initiate grooming	Present (grooming)	Nova
Initiate grooming	Present (grooming)	Nova
Initiate grooming	Present (grooming)	Nova
Initiate grooming	Present (grooming)	Nova
Initiate grooming	Present (grooming)	Nova
Initiate grooming	Present (grooming)	Nova
Initiate grooming	Present (grooming)	Nova
Initiate grooming	Present (grooming)	Nova
Initiate grooming	Present (grooming)	Otoko
Initiate grooming	Present (grooming)	Otomi
Initiate grooming	Present (grooming)	Otomi
Initiate grooming	Present (grooming)	Otomi
Initiate grooming	Present (grooming)	Otomi
Initiate grooming	Present (grooming)	Otomi
Initiate grooming	Present (grooming)	Otomi
Initiate grooming	Present (grooming)	Otomi
Initiate grooming	Present (grooming)	Otomi
Initiate grooming	Present (grooming)	Otomi
Initiate grooming	Present (grooming)	Otomi
Initiate grooming	Present (grooming)	Otomi
Initiate grooming	Present (grooming)	Otomi
Initiate grooming	Present (grooming)	Otomi
Initiate grooming	Present (grooming)	Otomi
Initiate grooming	Present (grooming)	Otomi
Initiate grooming	Present (grooming)	Otomi
Initiate grooming	Present (grooming)	Otomi
Initiate grooming	Present (grooming)	Otomi
Initiate grooming	Present (grooming)	Otomi
Initiate grooming	Present (grooming)	Otomi
Initiate grooming	Present (grooming)	Otomi
Initiate grooming	Present (grooming)	Otomi
Initiate grooming	Present (grooming)	Otomi
Initiate grooming	Present (grooming)	Otomi
Initiate grooming	Present (grooming)	Otomi
Initiate grooming	Present (grooming)	Otomi
Initiate grooming	Present (grooming)	Otomi
Initiate grooming	Present (grooming)	Otomi
Initiate grooming	Present (grooming)	Otomi
Initiate grooming	Present (grooming)	Otomi
Initiate grooming	Present (grooming)	Otomi
Initiate grooming	Present (grooming)	Otomi
Initiate grooming	Present (grooming)	Otomi
Initiate grooming	Present (grooming)	Otomi
Initiate grooming	Present (grooming)	Otomi
Initiate grooming	Present (grooming)	Otomi
Initiate grooming	Present (grooming)	Otomi
Initiate grooming	Present (grooming)	Otomi
Initiate grooming	Present (grooming)	Otomi
Initiate grooming	Present (grooming)	Otomi
Initiate grooming	Present (grooming)	Otomi
Initiate grooming	Present (grooming)	Pao
Initiate grooming	Present (grooming)	Pao
Initiate grooming	Present (grooming)	Pao
Initiate grooming	Present (grooming)	Pao
Initiate grooming	Present (grooming)	Pao
Initiate grooming	Present (grooming)	Pao
Initiate grooming	Present (grooming)	Pao
Initiate grooming	Present (grooming)	Pao
Initiate grooming	Present (grooming)	Pao
Initiate grooming	Present (grooming)	Pao
Initiate grooming	Present (grooming)	Pao
Initiate grooming	Present (grooming)	Pao
Initiate grooming	Present (grooming)	Pao
Initiate grooming	Present (grooming)	Pao
Initiate grooming	Present (grooming)	Pao
Initiate grooming	Present (grooming)	Pao
Initiate grooming	Present (grooming)	Pao
Initiate grooming	Present (grooming)	Pao
Initiate grooming	Present (grooming)	Pao
Initiate grooming	Present (grooming)	Pao
Initiate grooming	Present (grooming)	Pao
Initiate grooming	Present (grooming)	Pao
Initiate grooming	Present (grooming)	Pao
Initiate grooming	Present (grooming)	Pao
Initiate grooming	Present (grooming)	Pao
Initiate grooming	Present (grooming)	Pao
Initiate grooming	Present (grooming)	Pao
Initiate grooming	Present (grooming)	Pao
Initiate grooming	Present (grooming)	Pao
Initiate grooming	Present (grooming)	Pipi
Initiate grooming	Present (grooming)	Pipi
Initiate grooming	Present (grooming)	Pipi
Initiate grooming	Present (grooming)	Pipi
Initiate grooming	Present (grooming)	Pipi
Initiate grooming	Present (grooming)	Pipi
Initiate grooming	Present (grooming)	Pipi
Initiate grooming	Present (grooming)	Pipi
Initiate grooming	Present (grooming)	Puffy
Initiate grooming	Present (grooming)	Puffy
Initiate grooming	Present (grooming)	Puffy
Initiate grooming	Present (grooming)	Puffy
Initiate grooming	Present (grooming)	Puffy
Initiate grooming	Present (grooming)	Puffy
Initiate grooming	Present (grooming)	Puffy
Initiate grooming	Present (grooming)	Puffy
Initiate grooming	Present (grooming)	Puffy
Initiate grooming	Present (grooming)	Puffy
Initiate grooming	Present (grooming)	Puffy
Initiate grooming	Present (grooming)	Puffy
Initiate grooming	Present (grooming)	Puffy
Initiate grooming	Present (grooming)	Puffy
Initiate grooming	Present (grooming)	Puffy
Initiate grooming	Present (grooming)	Puffy
Initiate grooming	Present (grooming)	Sachi
Initiate grooming	Present (grooming)	Sachi
Initiate grooming	Present (grooming)	Sachi
Initiate grooming	Present (grooming)	Sachi
Initiate grooming	Present (grooming)	Sachi
Initiate grooming	Present (grooming)	Sachi
Initiate grooming	Present (grooming)	Sachi
Initiate grooming	Present (grooming)	Saku
Initiate grooming	Present (grooming)	Saku
Initiate grooming	Present (grooming)	Saku
Initiate grooming	Present (grooming)	Saku
Initiate grooming	Present (grooming)	Saku
Initiate grooming	Present (grooming)	Saku
Initiate grooming	Present (grooming)	Saku
Initiate grooming	Present (grooming)	Saku
Initiate grooming	Present (grooming)	Saku
Initiate grooming	Present (grooming)	Saku
Initiate grooming	Present (grooming)	Saku
Initiate grooming	Present (grooming)	Saku
Initiate grooming	Present (grooming)	Saku
Initiate grooming	Present (grooming)	Sala
Initiate grooming	Present (grooming)	Sala
Initiate grooming	Present (grooming)	Sala
Initiate grooming	Present (grooming)	Sala
Initiate grooming	Present (grooming)	Sala
Initiate grooming	Present (grooming)	Sala
Initiate grooming	Present (grooming)	Sala
Initiate grooming	Present (grooming)	Sala
Initiate grooming	Present (grooming)	Sala
Initiate grooming	Present (grooming)	Shiba
Initiate grooming	Present (grooming)	Shiba
Initiate grooming	Present (grooming)	Shiba
Initiate grooming	Present (grooming)	Shiba
Initiate grooming	Present (grooming)	Shiba
Initiate grooming	Present (grooming)	Snare
Initiate grooming	Present (grooming)	Snare
Initiate grooming	Present (grooming)	Snare
Initiate grooming	Present (grooming)	Snare
Initiate grooming	Present (grooming)	Snare
Initiate grooming	Present (grooming)	Snare
Initiate grooming	Present (grooming)	Snare
Initiate grooming	Present (grooming)	Snare
Initiate grooming	Present (grooming)	Snare
Initiate grooming	Present (grooming)	Snare
Initiate grooming	Present (grooming)	Snare
Initiate grooming	Present (grooming)	Snare
Initiate grooming	Present (grooming)	Snare
Initiate grooming	Present (grooming)	Snare
Initiate grooming	Present (grooming)	Snare
Initiate grooming	Present (grooming)	Snare
Initiate grooming	Present (grooming)	Snare
Initiate grooming	Present (grooming)	Snare
Initiate grooming	Present (grooming)	Snare
Initiate grooming	Present (grooming)	Snare
Initiate grooming	Present (grooming)	Snare
Initiate grooming	Present (grooming)	Snare
Initiate grooming	Present (grooming)	Snare
Initiate grooming	Present (grooming)	Snare
Initiate grooming	Present (grooming)	Snare
Initiate grooming	Present (grooming)	Tawashi
Initiate grooming	Present (grooming)	Tawashi
Initiate grooming	Present (grooming)	Tawashi
Initiate grooming	Present (grooming)	Tawashi
Initiate grooming	Present (grooming)	Tawashi
Initiate grooming	Present (grooming)	Tawashi
Initiate grooming	Present (grooming)	Tawashi
Initiate grooming	Present (grooming)	Tawashi
Initiate grooming	Present (grooming)	Tawashi
Initiate grooming	Present (grooming)	Tawashi
Initiate grooming	Present (grooming)	Tawashi
Initiate grooming	Present (grooming)	Tawashi
Initiate grooming	Present (grooming)	Ten
Initiate grooming	Present (grooming)	Ten
Initiate grooming	Present (grooming)	Ten
Initiate grooming	Present (grooming)	Ten
Initiate grooming	Present (grooming)	Ten
Initiate grooming	Present (grooming)	Ten
Initiate grooming	Present (grooming)	Ten
Initiate grooming	Present (grooming)	Turkey
Initiate grooming	Present (grooming)	Turkey
Initiate grooming	Present (grooming)	Turkey
Initiate grooming	Present (grooming)	Turkey
Initiate grooming	Present (grooming)	Turkey
Initiate grooming	Present (grooming)	Turkey
Initiate grooming	Present (grooming)	Turkey
Initiate grooming	Present (grooming)	Turkey
Initiate grooming	Present (grooming)	Turkey
Initiate grooming	Present (grooming)	Turkey
Initiate grooming	Present (grooming)	Turkey
Initiate grooming	Present (grooming)	Turkey
Initiate grooming	Present (grooming)	Turkey
Initiate grooming	Present (grooming)	Turkey
Initiate grooming	Present (grooming)	Turkey
Initiate grooming	Present (grooming)	Turkey
Initiate grooming	Present (grooming)	Turkey
Initiate grooming	Present (grooming)	Turkey
Initiate grooming	Present (grooming)	Turkey
Initiate grooming	Present (grooming)	Turkey
Initiate grooming	Present (grooming)	Turkey
Initiate grooming	Present (grooming)	Turkey
Initiate grooming	Present (grooming)	Turkey
Initiate grooming	Present (grooming)	Turkey
Initiate grooming	Present (grooming)	Turkey
Initiate grooming	Present (grooming)	Turkey
Initiate grooming	Present (grooming)	Turkey
Initiate grooming	Present (grooming)	Turkey
Initiate grooming	Present (grooming)	Turkey
Initiate grooming	Present (grooming)	Yuki
Initiate grooming	Present (grooming)	Yuki
Initiate grooming	Present (grooming)	Yuki
Initiate grooming	Present (grooming)	Yuki
Initiate grooming	Present (grooming)	Yuki
Initiate grooming	Present (grooming)	Yuki
Initiate grooming	Present (grooming)	Yuki
Initiate grooming	Present (grooming)	Yuki
Initiate grooming	Present (grooming)	Yuki
Initiate grooming	Present (grooming)	Yuki
Initiate grooming	Present (grooming)	Yuki
Initiate grooming	Present (grooming)	Yuki
Initiate grooming	Present (grooming)	Yuki
Initiate grooming	Present (grooming)	Yuki
Initiate grooming	Present (grooming)	Yuki
Initiate grooming	Present (grooming)	Yuki
Initiate grooming	Present (grooming)	Yuki
Initiate grooming	Present (grooming)	Yuki
Initiate grooming	Present (grooming)	Yuki
Initiate grooming	Present (grooming)	Yuki
Initiate grooming	Present (grooming)	Yuki
Initiate grooming	Present (grooming)	Yuki
Initiate grooming	Present (grooming)	Yuki
Initiate grooming	Present (grooming)	Yuki
Initiate grooming	Present (grooming)	Yuki
Initiate grooming	Present (grooming)	Yuki
Initiate grooming	Present (grooming)	Yuki
Initiate grooming	Present (grooming)	Yume
Initiate grooming	Present (grooming)	Yume
Initiate grooming	Present (grooming)	Yume
Initiate grooming	Present (grooming)	Yume
Initiate grooming	Present (grooming)	Yume
Initiate grooming	Present (grooming)	Yume
Initiate grooming	Present (grooming)	Yume
Initiate grooming	Present (grooming)	Yume
Initiate grooming	Present (grooming)	Yume
Initiate grooming	Present (grooming)	Yume
Initiate grooming	Present (grooming)	Yume
Initiate grooming	Present (grooming)	Yume
Initiate grooming	Present (grooming)	Yume
Initiate grooming	Present (grooming)	Yume
Initiate grooming	Present (grooming)	Yume
Initiate grooming	Present (grooming)	Yume
Initiate grooming	Present (grooming)	Yume
Initiate grooming	Present (grooming)	Yume
Initiate grooming	Present (grooming)	Yume
Initiate grooming	Present (grooming)	Yume
Initiate grooming	Present (grooming)	Yume
Initiate grooming	Present (grooming)	Yume
Initiate grooming	Present (grooming)	Yume
Initiate grooming	Present (grooming)	Zina
Initiate grooming	Present (grooming)	Zina
Initiate grooming	Present (grooming)	Zina
Initiate grooming	Present (grooming)	Zina
Initiate grooming	Present (grooming)	Zina
Initiate grooming	Present (grooming)	Zina
Initiate grooming	Present (grooming)	Zina
Initiate grooming	Present (grooming)	Zina
Initiate grooming	Present (grooming)	Zina
Initiate grooming	Present (grooming)	Zina
Initiate grooming	Present (grooming)	Zina
Initiate grooming	Present (grooming)	Zina
Initiate grooming	Present (grooming)	Zina
Initiate grooming	Present (grooming)	Zina
Initiate grooming	Present (grooming)	Zina
Initiate grooming	Present (grooming)	Zina
Initiate grooming	Present (grooming)	Zina
Initiate grooming	Present (grooming)	Zina
Initiate grooming	Present (grooming)	Zina
Initiate grooming	Present (grooming)	Zina
Initiate grooming	Push	Tawashi
Initiate grooming	Reach	Ichi
Initiate grooming	Roll over	Marie
Initiate grooming	Stomp	Shiba
Initiate grooming	Stomp 2-feet	Shiba
Initiate grooming	Tandem walk	Jacky
Initiate grooming	Tandem walk	Loboko
Initiate grooming	Tandem walk	Loboko
Initiate grooming	Tandem walk	Natsuko
Initiate grooming	Touch other	Fuku
Initiate grooming	Touch other	Ichi
Initiate grooming	Touch other	Ichi
Initiate grooming	Touch other	Malusu
Initiate grooming	Touch other	Marie
Initiate grooming	Touch other	Natsuko
Initiate grooming	Touch other	Yuki
Move away	Bipedal rocking	Turkey
Move away	Arm swing	Natsuko
Move away	Arm swing	Shiba
Move away	Directed push	Ichiko
Move away	Directed push	Ichiko
Move away	Grab	Hideko
Move away	Grab	Seko
Move away	Hand fling	Fua
Move away	Hand fling	Ichiko
Move away	Hand fling	Ichiko
Move away	Hand fling	Kitaro
Move away	Hand fling	Michio
Move away	Hand fling	Pipi
Move away	Hand fling	Shiba
Move away	Hand fling	Shiba
Move away	Kick	Hachiro
Move away	Kick	Shiba
Move away	Object shake	Zina
Move away	Punch other	Hachiro
Move away	Punch other	Jolie
Move away	Punch other	Pipi
Move away	Punch other	Puffy
Move away	Push	Hachiro
Move away	Push	Jolie
Move away	Push	Kale
Move away	Push	Mazy
Move away	Push	Pipi
Move away	Push	Seko
Move away	Push	Seko
Move away	Slap other	Hideo
Move away	Touch other	Hideo
Move away	Touch other	Ichiko
Move away	Touch other	Ichiko
Move away	Touch other	Jolie
Move away	Touch other	Mazy
Move away	Touch other	Mazy
Move away	Touch other	Shiba
Move closer	Stroking	Kitaro
Move closer	Arm swing	Nao
Move closer	Beckon	Pukka
Move closer	Beckon	Saku
Move closer	Grab	Kitaro
Move closer	Grab-pull	Hachiro
Move closer	Grab-pull	Hideo
Move closer	Grab-pull	Jolie
Move closer	Grab-pull	Nobita
Move closer	Grab-pull	Saku
Move closer	Grab-pull	Sala
Move closer	Hand on	Kale
Move closer	Hand on	Nadir
Move closer	Hand shake	Pukka
Move closer	Touch other	Kitaro
Move closer	Touch other	Kitaro
Nursing	Arm-up	Kale
Nursing	Stroking	Kabo
Nursing	Arm raise	Ichi
Nursing	Directed push	Isao
Nursing	Embrace	Seko
Nursing	Grab	Isao
Nursing	Present (climb on)	Seko
Nursing	Tap object	Seko
Position	Arm swing	Jeudi
Position	Directed push	Nimba
Position	Grab	Hideko
Position	Grab	Kiku
Position	Grab	Malusu
Position	Grab	Nobita
Position	Grab	Nobita
Position	Grab	Otomi
Position	Grab	Otomi
Position	Grab	Ten
Position	Grab-pull	Bokuta
Position	Grab-pull	Dai
Position	Grab-pull	Fuku
Position	Grab-pull	Gauche
Position	Grab-pull	Hide
Position	Grab-pull	Hoshi
Position	Grab-pull	Hoshi
Position	Grab-pull	Jacky
Position	Grab-pull	Jeudi
Position	Grab-pull	Jiro
Position	Grab-pull	Kabo
Position	Grab-pull	Kiku
Position	Grab-pull	Kiku
Position	Grab-pull	Kitaro
Position	Grab-pull	Kitaro
Position	Grab-pull	Loboko
Position	Grab-pull	Loboko
Position	Grab-pull	Loboko
Position	Grab-pull	Malusu
Position	Grab-pull	Marie
Position	Grab-pull	Nadir
Position	Grab-pull	Nadir
Position	Grab-pull	Nadir
Position	Grab-pull	Nobita
Position	Grab-pull	Nova
Position	Grab-pull	Nova
Position	Grab-pull	Otomi
Position	Grab-pull	Otomi
Position	Grab-pull	Pao
Position	Grab-pull	Sachi
Position	Grab-pull	Shiba
Position	Grab-pull	Yuki
Position	Grab-pull	Yuki
Position	Touch other	Loboko
Position	Touch other	Nao
Position	Touch other	Nao
Position	Touch other	Nao
Position	Touch other	Ten
Sexual attention - copulation	Bipedal rocking	Saku
Sexual attention - copulation	Bipedal rocking	Turkey
Sexual attention - copulation	Bipedal stance	Fuku
Sexual attention - copulation	Bipedal stance	Jacky
Sexual attention - copulation	Bipedal stance	Marie
Sexual attention - copulation	Bipedal stance	Nao
Sexual attention - copulation	Bipedal stance	Nova
Sexual attention - copulation	Bipedal stance	Nova
Sexual attention - copulation	Bipedal stance	Otomi
Sexual attention - copulation	Bipedal stance	Sala
Sexual attention - copulation	Bipedal stance	Sala
Sexual attention - copulation	Bipedal stance	Zina
Sexual attention - copulation	Hip thrust	Hoshi
Sexual attention - copulation	Hip thrust	Kitaro
Sexual attention - copulation	Hip thrust	Nadir
Sexual attention - copulation	Hip thrust	Pipi
Sexual attention - copulation	Hip thrust	Saku
Sexual attention - copulation	Leg flap	Hide
Sexual attention - copulation	Leg flap	Hoshi
Sexual attention - copulation	Leg flap	Jacky
Sexual attention - copulation	Leg flap	Marie
Sexual attention - copulation	Leg flap	Marie
Sexual attention - copulation	Leg flap	Nao
Sexual attention - copulation	Leg flap	Pipi
Sexual attention - copulation	Leg flap	Sala
Sexual attention - copulation	Rocking	Ikura
Sexual attention - copulation	Rocking	Jiro
Sexual attention - copulation	Rocking	Kiyota
Sexual attention - copulation	Rocking	Maluta
Sexual attention - copulation	Rocking	Marie
Sexual attention - copulation	Rocking	Marie
Sexual attention - copulation	Rocking	Marie
Sexual attention - copulation	Rocking	Marie
Sexual attention - copulation	Rocking	Marie
Sexual attention - copulation	Rocking	Marie
Sexual attention - copulation	Rocking	Nao
Sexual attention - copulation	Rocking	Saku
Sexual attention - copulation	Arm raise	Bokuta
Sexual attention - copulation	Arm raise	Hideko
Sexual attention - copulation	Arm raise	Hoshi
Sexual attention - copulation	Arm raise	Hoshi
Sexual attention - copulation	Arm raise	Jacky
Sexual attention - copulation	Arm raise	Marie
Sexual attention - copulation	Arm raise	Marie
Sexual attention - copulation	Arm raise	Marie
Sexual attention - copulation	Arm raise	Nao
Sexual attention - copulation	Arm raise	Nao
Sexual attention - copulation	Arm raise	Nao
Sexual attention - copulation	Arm raise	Nova
Sexual attention - copulation	Arm raise	Otomi
Sexual attention - copulation	Arm raise	Otomi
Sexual attention - copulation	Arm raise	Sala
Sexual attention - copulation	Arm raise	Sala
Sexual attention - copulation	Arm raise	Zina
Sexual attention - copulation	Arm swing	Ana
Sexual attention - copulation	Arm swing	Fuku
Sexual attention - copulation	Arm swing	Jacky
Sexual attention - copulation	Arm swing	Jacky
Sexual attention - copulation	Arm swing	Kitaro
Sexual attention - copulation	Arm swing	Marie
Sexual attention - copulation	Arm swing	Marie
Sexual attention - copulation	Arm swing	Marie
Sexual attention - copulation	Arm swing	Nao
Sexual attention - copulation	Arm swing	Nobita
Sexual attention - copulation	Arm swing	Otomi
Sexual attention - copulation	Arm swing	Puffy
Sexual attention - copulation	Arm wave	Maluta
Sexual attention - copulation	Dangle	Fuku
Sexual attention - copulation	Dangle	Michio
Sexual attention - copulation	Dangle	Nadir
Sexual attention - copulation	Dangle	Nara
Sexual attention - copulation	Grab	Turkey
Sexual attention - copulation	Grab-pull	Fuku
Sexual attention - copulation	Hand on	Otomi
Sexual attention - copulation	Head rock	Marie
Sexual attention - copulation	Leg swing	Fuku
Sexual attention - copulation	Leg swing	Kitaro
Sexual attention - copulation	Leg swing	Kitaro
Sexual attention - copulation	Leg swing	Marie
Sexual attention - copulation	Leg swing	Saku
Sexual attention - copulation	Object move	Ichiko
Sexual attention - copulation	Object move	Turkey
Sexual attention - copulation	Object shake	Fuku
Sexual attention - copulation	Object shake	Kitaro
Sexual attention - copulation	Object shake	Marie
Sexual attention - copulation	Object shake	Nobita
Sexual attention - copulation	Object shake	Otomi
Sexual attention - copulation	Object shake	Zina
Sexual attention - copulation	Poke	Fuku
Sexual attention - copulation	Poke	Puffy
Sexual attention - copulation	Present (genitals backward)	Fuku
Sexual attention - copulation	Present (genitals backward)	Ikura
Sexual attention - copulation	Present (genitals backward)	Ikura
Sexual attention - copulation	Present (genitals backward)	Ikura
Sexual attention - copulation	Present (genitals backward)	Ikura
Sexual attention - copulation	Present (genitals backward)	Ikura
Sexual attention - copulation	Present (genitals backward)	Kitaro
Sexual attention - copulation	Present (genitals backward)	Kitaro
Sexual attention - copulation	Present (genitals backward)	Kitaro
Sexual attention - copulation	Present (genitals backward)	Kitaro
Sexual attention - copulation	Present (genitals backward)	Kitaro
Sexual attention - copulation	Present (genitals backward)	Kiyota
Sexual attention - copulation	Present (genitals backward)	Shiba
Sexual attention - copulation	Present (genitals backward)	Turkey
Sexual attention - copulation	Present (genitals backward)	Turkey
Sexual attention - copulation	Present (genitals forward)	Ana
Sexual attention - copulation	Present (genitals forward)	Daniel
Sexual attention - copulation	Present (genitals forward)	Daniel
Sexual attention - copulation	Present (genitals forward)	Fuku
Sexual attention - copulation	Present (genitals forward)	Fuku
Sexual attention - copulation	Present (genitals forward)	Fuku
Sexual attention - copulation	Present (genitals forward)	Fuku
Sexual attention - copulation	Present (genitals forward)	Fuku
Sexual attention - copulation	Present (genitals forward)	Fuku
Sexual attention - copulation	Present (genitals forward)	Hachiro
Sexual attention - copulation	Present (genitals forward)	Hachiro
Sexual attention - copulation	Present (genitals forward)	Hide
Sexual attention - copulation	Present (genitals forward)	Hide
Sexual attention - copulation	Present (genitals forward)	Hide
Sexual attention - copulation	Present (genitals forward)	Hideko
Sexual attention - copulation	Present (genitals forward)	Hideko
Sexual attention - copulation	Present (genitals forward)	Hideko
Sexual attention - copulation	Present (genitals forward)	Hideko
Sexual attention - copulation	Present (genitals forward)	Hideo
Sexual attention - copulation	Present (genitals forward)	Hoshi
Sexual attention - copulation	Present (genitals forward)	Hoshi
Sexual attention - copulation	Present (genitals forward)	Hoshi
Sexual attention - copulation	Present (genitals forward)	Hoshi
Sexual attention - copulation	Present (genitals forward)	Hoshi
Sexual attention - copulation	Present (genitals forward)	Hoshi
Sexual attention - copulation	Present (genitals forward)	Hoshi
Sexual attention - copulation	Present (genitals forward)	Hoshi
Sexual attention - copulation	Present (genitals forward)	Hoshi
Sexual attention - copulation	Present (genitals forward)	Hoshi
Sexual attention - copulation	Present (genitals forward)	Hoshi
Sexual attention - copulation	Present (genitals forward)	Ichi
Sexual attention - copulation	Present (genitals forward)	Ichi
Sexual attention - copulation	Present (genitals forward)	Ichi
Sexual attention - copulation	Present (genitals forward)	Ichi
Sexual attention - copulation	Present (genitals forward)	Ichiko
Sexual attention - copulation	Present (genitals forward)	Ichiko
Sexual attention - copulation	Present (genitals forward)	Isao
Sexual attention - copulation	Present (genitals forward)	Jacky
Sexual attention - copulation	Present (genitals forward)	Jacky
Sexual attention - copulation	Present (genitals forward)	Jacky
Sexual attention - copulation	Present (genitals forward)	Jacky
Sexual attention - copulation	Present (genitals forward)	Jacky
Sexual attention - copulation	Present (genitals forward)	Jacky
Sexual attention - copulation	Present (genitals forward)	Jacky
Sexual attention - copulation	Present (genitals forward)	Jacky
Sexual attention - copulation	Present (genitals forward)	Jacky
Sexual attention - copulation	Present (genitals forward)	Jacky
Sexual attention - copulation	Present (genitals forward)	Jacky
Sexual attention - copulation	Present (genitals forward)	Jacky
Sexual attention - copulation	Present (genitals forward)	Jacky
Sexual attention - copulation	Present (genitals forward)	Jacky
Sexual attention - copulation	Present (genitals forward)	Jacky
Sexual attention - copulation	Present (genitals forward)	Jacky
Sexual attention - copulation	Present (genitals forward)	Jacky
Sexual attention - copulation	Present (genitals forward)	Jacky
Sexual attention - copulation	Present (genitals forward)	Jacky
Sexual attention - copulation	Present (genitals forward)	Kaboko
Sexual attention - copulation	Present (genitals forward)	Kaboko
Sexual attention - copulation	Present (genitals forward)	Kaboko
Sexual attention - copulation	Present (genitals forward)	Kale
Sexual attention - copulation	Present (genitals forward)	Kitaro
Sexual attention - copulation	Present (genitals forward)	Kitaro
Sexual attention - copulation	Present (genitals forward)	Kitaro
Sexual attention - copulation	Present (genitals forward)	Kitaro
Sexual attention - copulation	Present (genitals forward)	Kiyota
Sexual attention - copulation	Present (genitals forward)	Kiyota
Sexual attention - copulation	Present (genitals forward)	Kiyota
Sexual attention - copulation	Present (genitals forward)	Kiyota
Sexual attention - copulation	Present (genitals forward)	Kiyota
Sexual attention - copulation	Present (genitals forward)	Maluta
Sexual attention - copulation	Present (genitals forward)	Maluta
Sexual attention - copulation	Present (genitals forward)	Marie
Sexual attention - copulation	Present (genitals forward)	Marie
Sexual attention - copulation	Present (genitals forward)	Marie
Sexual attention - copulation	Present (genitals forward)	Marie
Sexual attention - copulation	Present (genitals forward)	Marie
Sexual attention - copulation	Present (genitals forward)	Marie
Sexual attention - copulation	Present (genitals forward)	Marie
Sexual attention - copulation	Present (genitals forward)	Marie
Sexual attention - copulation	Present (genitals forward)	Marie
Sexual attention - copulation	Present (genitals forward)	Marie
Sexual attention - copulation	Present (genitals forward)	Marie
Sexual attention - copulation	Present (genitals forward)	Marie
Sexual attention - copulation	Present (genitals forward)	Marie
Sexual attention - copulation	Present (genitals forward)	Marie
Sexual attention - copulation	Present (genitals forward)	Marie
Sexual attention - copulation	Present (genitals forward)	Marie
Sexual attention - copulation	Present (genitals forward)	Marie
Sexual attention - copulation	Present (genitals forward)	Marie
Sexual attention - copulation	Present (genitals forward)	Marie
Sexual attention - copulation	Present (genitals forward)	Marie
Sexual attention - copulation	Present (genitals forward)	Marie
Sexual attention - copulation	Present (genitals forward)	Marie
Sexual attention - copulation	Present (genitals forward)	Nadir
Sexual attention - copulation	Present (genitals forward)	Nao
Sexual attention - copulation	Present (genitals forward)	Nao
Sexual attention - copulation	Present (genitals forward)	Nao
Sexual attention - copulation	Present (genitals forward)	Nao
Sexual attention - copulation	Present (genitals forward)	Nao
Sexual attention - copulation	Present (genitals forward)	Nao
Sexual attention - copulation	Present (genitals forward)	Nao
Sexual attention - copulation	Present (genitals forward)	Nao
Sexual attention - copulation	Present (genitals forward)	Nao
Sexual attention - copulation	Present (genitals forward)	Nao
Sexual attention - copulation	Present (genitals forward)	Nao
Sexual attention - copulation	Present (genitals forward)	Nara
Sexual attention - copulation	Present (genitals forward)	Nara
Sexual attention - copulation	Present (genitals forward)	Nara
Sexual attention - copulation	Present (genitals forward)	Natsuko
Sexual attention - copulation	Present (genitals forward)	Nova
Sexual attention - copulation	Present (genitals forward)	Nova
Sexual attention - copulation	Present (genitals forward)	Nova
Sexual attention - copulation	Present (genitals forward)	Nova
Sexual attention - copulation	Present (genitals forward)	Nova
Sexual attention - copulation	Present (genitals forward)	Nova
Sexual attention - copulation	Present (genitals forward)	Nova
Sexual attention - copulation	Present (genitals forward)	Nova
Sexual attention - copulation	Present (genitals forward)	Nova
Sexual attention - copulation	Present (genitals forward)	Nova
Sexual attention - copulation	Present (genitals forward)	Otomi
Sexual attention - copulation	Present (genitals forward)	Otomi
Sexual attention - copulation	Present (genitals forward)	Otomi
Sexual attention - copulation	Present (genitals forward)	Otomi
Sexual attention - copulation	Present (genitals forward)	Otomi
Sexual attention - copulation	Present (genitals forward)	Pao
Sexual attention - copulation	Present (genitals forward)	Pao
Sexual attention - copulation	Present (genitals forward)	Pao
Sexual attention - copulation	Present (genitals forward)	Pao
Sexual attention - copulation	Present (genitals forward)	Pao
Sexual attention - copulation	Present (genitals forward)	Pao
Sexual attention - copulation	Present (genitals forward)	Pipi
Sexual attention - copulation	Present (genitals forward)	Pipi
Sexual attention - copulation	Present (genitals forward)	Pipi
Sexual attention - copulation	Present (genitals forward)	Pipi
Sexual attention - copulation	Present (genitals forward)	Puffy
Sexual attention - copulation	Present (genitals forward)	Puffy
Sexual attention - copulation	Present (genitals forward)	Puffy
Sexual attention - copulation	Present (genitals forward)	Puffy
Sexual attention - copulation	Present (genitals forward)	Puffy
Sexual attention - copulation	Present (genitals forward)	Puffy
Sexual attention - copulation	Present (genitals forward)	Saku
Sexual attention - copulation	Present (genitals forward)	Saku
Sexual attention - copulation	Present (genitals forward)	Sala
Sexual attention - copulation	Present (genitals forward)	Sala
Sexual attention - copulation	Present (genitals forward)	Sala
Sexual attention - copulation	Present (genitals forward)	Sala
Sexual attention - copulation	Present (genitals forward)	Sala
Sexual attention - copulation	Present (genitals forward)	Sala
Sexual attention - copulation	Present (genitals forward)	Sala
Sexual attention - copulation	Present (genitals forward)	Sala
Sexual attention - copulation	Present (genitals forward)	Sala
Sexual attention - copulation	Present (genitals forward)	Sala
Sexual attention - copulation	Present (genitals forward)	Sala
Sexual attention - copulation	Present (genitals forward)	Sala
Sexual attention - copulation	Present (genitals forward)	Sala
Sexual attention - copulation	Present (genitals forward)	Seko
Sexual attention - copulation	Present (genitals forward)	Seko
Sexual attention - copulation	Present (genitals forward)	Seko
Sexual attention - copulation	Present (genitals forward)	Seko
Sexual attention - copulation	Present (genitals forward)	Seko
Sexual attention - copulation	Present (genitals forward)	Seko
Sexual attention - copulation	Present (genitals forward)	Seko
Sexual attention - copulation	Present (genitals forward)	Shiba
Sexual attention - copulation	Present (genitals forward)	Snare
Sexual attention - copulation	Present (genitals forward)	Turkey
Sexual attention - copulation	Present (genitals forward)	Turkey
Sexual attention - copulation	Present (genitals forward)	Zina
Sexual attention - copulation	Present (genitals forward)	Zina
Sexual attention - copulation	Throw object	Snare
Sexual attention - copulation	Touch other	Hoshi
Sexual attention - copulation	Touch other	Hoshi
Sexual attention - copulation	Touch other	Hoshi
Sexual attention - copulation	Touch other	Marie
Sexual attention - copulation	Touch other	Marie
Sexual attention - copulation	Touch other	Otomi
Sexual attention - GG rub	Bipedal rocking	Ana
Sexual attention - GG rub	Bipedal rocking	Hoshi
Sexual attention - GG rub	Bipedal rocking	Jacky
[truncated: 464 more rows]

## Sheet: Chimp Raw
function	gesture 66	signaller
Acquire object/food	Arm raise	Karibu
Acquire object/food	Arm raise	Kasigwa
Acquire object/food	Arm raise	Monika
Acquire object/food	Arm raise	Monika
Acquire object/food	Arm raise	Night
Acquire object/food	Arm raise	Night
Acquire object/food	Arm raise	Night
Acquire object/food	Arm raise	Night
Acquire object/food	Arm raise	Night
Acquire object/food	Arm raise	Night
Acquire object/food	Arm raise	Zak
Acquire object/food	Arm raise	Zed
Acquire object/food	Arm raise	Zed
Acquire object/food	Arm shake	Zed
Acquire object/food	Arm swing	Night
Acquire object/food	Arm swing	Night
Acquire object/food	Dangle	Zak
Acquire object/food	Directed push	Karibu
Acquire object/food	Directed push	Karibu
Acquire object/food	Directed push	Karibu
Acquire object/food	Directed push	Night
Acquire object/food	Directed push	Tinka
Acquire object/food	Hand on	Night
Acquire object/food	Hand on	Zed
Acquire object/food	Hand on	Zed
Acquire object/food	Leg swing	Night
Acquire object/food	Mouth stroke	Herry
Acquire object/food	Mouth stroke	Herry
Acquire object/food	Mouth stroke	Karibu
Acquire object/food	Mouth stroke	Karo
Acquire object/food	Mouth stroke	Karo
Acquire object/food	Mouth stroke	Kasigwa
Acquire object/food	Mouth stroke	Kasigwa
Acquire object/food	Mouth stroke	Kasigwa
Acquire object/food	Mouth stroke	Kasigwa
Acquire object/food	Mouth stroke	Kasigwa
Acquire object/food	Mouth stroke	Kumi
Acquire object/food	Mouth stroke	Kwezi
Acquire object/food	Mouth stroke	Monika
Acquire object/food	Mouth stroke	Night
Acquire object/food	Mouth stroke	Night
Acquire object/food	Mouth stroke	Night
Acquire object/food	Mouth stroke	Night
Acquire object/food	Mouth stroke	Night
Acquire object/food	Mouth stroke	Night
Acquire object/food	Mouth stroke	Night
Acquire object/food	Mouth stroke	Rose
Acquire object/food	Mouth stroke	Zed
Acquire object/food	Object move	Zak
Acquire object/food	Object shake	Hawa
Acquire object/food	Object shake	Kwezi
Acquire object/food	Object shake	Kwezi
Acquire object/food	Object shake	Night
Acquire object/food	Object shake	Night
Acquire object/food	Object shake	Night
Acquire object/food	Present (sexual)	Kwera
Acquire object/food	Present (sexual)	Kwera
Acquire object/food	Present (sexual)	Mukwano
Acquire object/food	Punch other	Night
Acquire object/food	Reach	Fred
Acquire object/food	Reach	Fred
Acquire object/food	Reach	Fred
Acquire object/food	Reach	Fred
Acquire object/food	Reach	Hawa
Acquire object/food	Reach	Hawa
Acquire object/food	Reach	Herry
Acquire object/food	Reach	Kalema
Acquire object/food	Reach	Kalema
Acquire object/food	Reach	Kalema
Acquire object/food	Reach	Kalema
Acquire object/food	Reach	Kalema
Acquire object/food	Reach	Kalema
Acquire object/food	Reach	Kalema
Acquire object/food	Reach	Kalema
Acquire object/food	Reach	Kalema
Acquire object/food	Reach	Kalema
Acquire object/food	Reach	Karibu
Acquire object/food	Reach	Karibu
Acquire object/food	Reach	Karo
Acquire object/food	Reach	Karo
Acquire object/food	Reach	Karo
Acquire object/food	Reach	Karo
Acquire object/food	Reach	Karo
Acquire object/food	Reach	Karo
Acquire object/food	Reach	Kasigwa
Acquire object/food	Reach	Kasigwa
Acquire object/food	Reach	Kasigwa
Acquire object/food	Reach	Kasigwa
Acquire object/food	Reach	Kasigwa
Acquire object/food	Reach	Kasigwa
Acquire object/food	Reach	Kasigwa
Acquire object/food	Reach	Kasigwa
Acquire object/food	Reach	Kasigwa
Acquire object/food	Reach	Kasigwa
Acquire object/food	Reach	Kasigwa
Acquire object/food	Reach	Kasigwa
Acquire object/food	Reach	Kasigwa
Acquire object/food	Reach	Kasigwa
Acquire object/food	Reach	Kasigwa
Acquire object/food	Reach	Kasigwa
Acquire object/food	Reach	Kasigwa
Acquire object/food	Reach	Kasigwa
Acquire object/food	Reach	Kasigwa
Acquire object/food	Reach	Kasigwa
Acquire object/food	Reach	Kasigwa
Acquire object/food	Reach	Kasigwa
Acquire object/food	Reach	Kasigwa
Acquire object/food	Reach	Kasigwa
Acquire object/food	Reach	Kasigwa
Acquire object/food	Reach	Kasigwa
Acquire object/food	Reach	Kasigwa
Acquire object/food	Reach	Kasigwa
Acquire object/food	Reach	Kasigwa
Acquire object/food	Reach	Kasigwa
Acquire object/food	Reach	Kasigwa
Acquire object/food	Reach	Kasigwa
Acquire object/food	Reach	Kasigwa
Acquire object/food	Reach	Kasigwa
Acquire object/food	Reach	Kasigwa
Acquire object/food	Reach	Kasigwa
Acquire object/food	Reach	Kasigwa
Acquire object/food	Reach	Kasigwa
Acquire object/food	Reach	Kasigwa
Acquire object/food	Reach	Kasigwa
Acquire object/food	Reach	Kasigwa
Acquire object/food	Reach	Kasigwa
Acquire object/food	Reach	Kasigwa
Acquire object/food	Reach	Katia
Acquire object/food	Reach	Katia
Acquire object/food	Reach	Katia
Acquire object/food	Reach	Katia
Acquire object/food	Reach	Katia
Acquire object/food	Reach	Katia
Acquire object/food	Reach	Katia
Acquire object/food	Reach	Katia
Acquire object/food	Reach	Katia
Acquire object/food	Reach	Katia
Acquire object/food	Reach	Katia
Acquire object/food	Reach	Katia
Acquire object/food	Reach	Katia
Acquire object/food	Reach	Kumi
Acquire object/food	Reach	Kumi
Acquire object/food	Reach	Kumi
Acquire object/food	Reach	Kumi
Acquire object/food	Reach	Kumi
Acquire object/food	Reach	Kumi
Acquire object/food	Reach	Kumi
Acquire object/food	Reach	Kutu
Acquire object/food	Reach	Kwera
Acquire object/food	Reach	Kwera
Acquire object/food	Reach	Kwezi
Acquire object/food	Reach	Kwezi
Acquire object/food	Reach	Kwezi
Acquire object/food	Reach	Kwezi
Acquire object/food	Reach	Kwezi
Acquire object/food	Reach	Kwezi
Acquire object/food	Reach	Mukwano
Acquire object/food	Reach	Mukwano
Acquire object/food	Reach	Mukwano
Acquire object/food	Reach	Nambi
Acquire object/food	Reach	Nambi
Acquire object/food	Reach	Nambi
Acquire object/food	Reach	Nambi
Acquire object/food	Reach	Night
Acquire object/food	Reach	Night
Acquire object/food	Reach	Night
Acquire object/food	Reach	Night
Acquire object/food	Reach	Night
Acquire object/food	Reach	Night
Acquire object/food	Reach	Night
Acquire object/food	Reach	Night
Acquire object/food	Reach	Night
Acquire object/food	Reach	Night
Acquire object/food	Reach	Night
Acquire object/food	Reach	Night
Acquire object/food	Reach	Rose
Acquire object/food	Reach	Rose
Acquire object/food	Reach	Rose
Acquire object/food	Reach	Rose
Acquire object/food	Reach	Tinka
Acquire object/food	Reach	Tinka
Acquire object/food	Reach	Tinka
Acquire object/food	Reach	Tinka
Acquire object/food	Reach	Tinka
Acquire object/food	Reach	Tinka
Acquire object/food	Reach	Tinka
Acquire object/food	Reach	Tinka
Acquire object/food	Reach	Zed
Acquire object/food	Reach	Zed
Acquire object/food	Reach	Zed
Acquire object/food	Reach	Zed
Acquire object/food	Reach	Zed
Acquire object/food	Reach	Zed
Acquire object/food	Reach	Zed
Acquire object/food	Reach	Zed
Acquire object/food	Reach	Zed
Acquire object/food	Reach	Zed
Acquire object/food	Reach	Zed
Acquire object/food	Reach	Zed
Acquire object/food	Reach	Zed
Acquire object/food	Reach	Zed
Acquire object/food	Reach	Zed
Acquire object/food	Reach	Zed
Acquire object/food	Reach	Zed
Acquire object/food	Reach	Zed
Acquire object/food	Reach	Zed
Acquire object/food	Reach	Zed
Acquire object/food	Reach	Zed
Acquire object/food	Reach	Zed
Acquire object/food	Reach	Zed
Acquire object/food	Reach	Zed
Acquire object/food	Reach	Zed
Acquire object/food	Reach	Zed
Acquire object/food	Reach	Zefa
Acquire object/food	Reach	Zefa
Acquire object/food	Reach	Zefa
Acquire object/food	Reach	Zefa
Acquire object/food	Reach	Zefa
Acquire object/food	Reach	Zefa
Acquire object/food	Reach	Zefa
Acquire object/food	Reach	Zefa
Acquire object/food	Reach	Zefa
Acquire object/food	Reach	Zig
Acquire object/food	Reach	Zig
Acquire object/food	Reach	Zig
Acquire object/food	Slap object	Zed
Acquire object/food	Slap object	Zed
Acquire object/food	Touch other	Kasigwa
Acquire object/food	Touch other	Katia
Acquire object/food	Touch other	Kumi
Acquire object/food	Touch other	Kumi
Acquire object/food	Touch other	Kumi
Acquire object/food	Touch other	Kumi
Acquire object/food	Touch other	Kumi
Acquire object/food	Touch other	Kutu
Acquire object/food	Touch other	Kutu
Acquire object/food	Touch other	Kutu
Acquire object/food	Touch other	Kwezi
Acquire object/food	Touch other	Monika
Acquire object/food	Touch other	Nambi
Acquire object/food	Touch other	Night
Acquire object/food	Touch other	Night
Acquire object/food	Touch other	Night
Acquire object/food	Touch other	Night
Acquire object/food	Touch other	Night
Acquire object/food	Touch other	Tinka
Acquire object/food	Touch other	Tinka
Acquire object/food	Touch other	Tinka
Acquire object/food	Touch other	Tinka
Acquire object/food	Touch other	Tinka
Acquire object/food	Touch other	Tinka
Acquire object/food	Touch other	Zak
Acquire object/food	Touch other	Zak
Acquire object/food	Touch other	Zed
Acquire object/food	Touch other	Zed
Climb on - me	Big Loud Scratch	Kalema
Climb on - me	Directed push	Harriet
Climb on - me	Directed push	Harriet
Climb on - me	Directed push	Janie
Climb on - me	Directed push	Janie
Climb on - me	Directed push	Janie
Climb on - me	Directed push	Janie
Climb on - me	Directed push	Janie
Climb on - me	Directed push	Janie
Climb on - me	Directed push	Janie
Climb on - me	Directed push	Janie
Climb on - me	Directed push	Janie
Climb on - me	Directed push	Kalema
Climb on - me	Directed push	Kalema
Climb on - me	Directed push	Kalema
Climb on - me	Directed push	Kalema
Climb on - me	Directed push	Kalema
Climb on - me	Directed push	Kalema
Climb on - me	Directed push	Kwera
Climb on - me	Directed push	Kwera
Climb on - me	Directed push	Nambi
Climb on - me	Directed push	Nambi
Climb on - me	Directed push	Nambi
Climb on - me	Directed push	Nambi
Climb on - me	Foot present	Janie
Climb on - me	Foot present	Janie
Climb on - me	Foot present	Janie
Climb on - me	Foot present	Janie
Climb on - me	Foot present	Janie
Climb on - me	Foot present	Nambi
Climb on - me	Grab	Kalema
Climb on - me	Grab	Nora
Climb on - me	Grab-pull	Kalema
Climb on - me	Grab-pull	Kwera
Climb on - me	Grab-pull	Kwera
Climb on - me	Present (climb on)	Janie
Climb on - me	Present (climb on)	Kalema
Climb on - me	Present (climb on)	Kalema
Climb on - me	Present (climb on)	Kalema
Climb on - me	Present (climb on)	Kalema
Climb on - me	Present (climb on)	Kalema
Climb on - me	Present (climb on)	Kalema
Climb on - me	Present (climb on)	Kalema
Climb on - me	Present (climb on)	Kalema
Climb on - me	Present (climb on)	Kalema
Climb on - me	Present (climb on)	Kwera
Climb on - me	Present (climb on)	Kwera
Climb on - me	Present (climb on)	Kwera
Climb on - me	Present (climb on)	Kwera
Climb on - me	Present (climb on)	Nambi
Climb on - me	Present (climb on)	Nambi
Climb on - me	Present (climb on)	Nambi
Climb on - me	Present (climb on)	Nambi
Climb on - me	Present (climb on)	Nora
Climb on - me	Reach	Harriet
Climb on - me	Reach	Janie
Climb on - me	Reach	Janie
Climb on - me	Reach	Janie
Climb on - me	Reach	Kalema
Climb on - me	Reach	Kalema
Climb on - me	Reach	Kalema
Climb on - me	Reach	Kwera
Climb on - me	Reach	Kwera
Climb on - me	Reach	Kwera
Climb on - me	Reach	Kwera
Climb on - me	Reach	Nambi
Climb on - me	Reach	Nambi
Climb on - me	Reach	Nora
Climb on - me	Reach	Ruhara
Climb on - me	Reach	Ruhara
Climb on - me	Reach	Ruhara
Climb on - me	Touch other	Kalema
Climb on - me	Touch other	Nambi
Climb on - me	Touch other	Nambi
Contact	Bite	Nick
Contact	Bite	Pascal
Contact	Bite	Zak
Contact	Embrace	Juliet
Contact	Embrace	Kwezi
Contact	Embrace	Nambi
Contact	Embrace	Nambi
Contact	Embrace	Nick
Contact	Embrace	Nick
Contact	Embrace	Nick
Contact	Embrace	Nick
Contact	Embrace	Nick
Contact	Embrace	Nick
Contact	Embrace	Night
Contact	Embrace	Night
Contact	Embrace	Night
Contact	Embrace	Sharlot
Contact	Embrace	Zak
Contact	Embrace	Zak
Contact	Embrace	Zalu
Contact	Embrace	Zefa
Contact	Embrace	Zefa
Contact	Embrace	Zefa
Contact	Embrace	Zefa
Contact	Embrace	Zefa
Contact	Grab-pull	Nick
Contact	Grab-pull	Nick
Contact	Hand on	Kwera
Contact	Hand on	Zalu
Contact	Pounce	Zak
Contact	Present (sexual)	Juliet
Contact	Present (sexual)	Kana
Contact	Present (sexual)	Kana
Contact	Present (sexual)	Kigere
Contact	Present (sexual)	Kigere
Contact	Present (sexual)	Kumi
Contact	Present (sexual)	Kutu
Contact	Present (sexual)	Kutu
Contact	Present (sexual)	Kutu
Contact	Present (sexual)	Kwera
Contact	Present (sexual)	Kwera
Contact	Present (sexual)	Kwezi
Contact	Present (sexual)	Kwezi
Contact	Present (sexual)	Lola
Contact	Present (sexual)	Lola
Contact	Present (sexual)	Lola
Contact	Present (sexual)	Lola
Contact	Present (sexual)	Lola
Contact	Present (sexual)	Lola
Contact	Present (sexual)	Musa
Contact	Present (sexual)	Musa
Contact	Present (sexual)	Nambi
Contact	Present (sexual)	Nick
Contact	Present (sexual)	Night
Contact	Present (sexual)	Pascal
Contact	Present (sexual)	Pascal
Contact	Present (sexual)	Sharlot
Contact	Present (sexual)	Sharlot
Contact	Present (sexual)	Zak
Contact	Present (sexual)	Zak
Contact	Present (sexual)	Zak
Contact	Present (sexual)	Zefa
Contact	Present (sexual)	Zefa
Contact	Reach	Juliet
Contact	Reach	Kana
Contact	Reach	Kigere
Contact	Reach	Kumi
Contact	Reach	Kutu
Contact	Reach	Kwera
Contact	Reach	Lola
Contact	Reach	Night
Contact	Reach	Pascal
Contact	Reach	Ruhara
Contact	Reach	Ruhara
Contact	Reach	Ruhara
Contact	Reach	Ruhara
Contact	Reach	Sharlot
Contact	Reach	Zak
Contact	Reach	Zalu
Contact	Reach	Zalu
Contact	Reach	Zalu
Contact	Reach	Zalu
Contact	Reach	Zefa
Contact	Rump rub	Musa
Contact	Rump rub	Nambi
Contact	Rump rub	Squibs
Contact	Shake hands	Hawa
Contact	Shake hands	Juliet
Contact	Shake hands	Kigere
Contact	Shake hands	Kumi
Contact	Shake hands	Nick
Contact	Shake hands	Nick
Contact	Tap other	Hawa
Contact	Tap other	Kwezi
Contact	Tap other	Kwezi
Contact	Touch other	Hawa
Contact	Touch other	Kwera
Contact	Touch other	Kwezi
Contact	Touch other	Lola
Contact	Touch other	Nick
Contact	Touch other	Nick
Contact	Touch other	Night
Contact	Touch other	Squibs
Contact	Touch other	Squibs
Contact	Touch other	Zak
Contact	Touch other	Zak
Contact	Touch other	Zalu
Follow	Arm shake	Duane
Follow	Arm shake	Duane
Follow	Arm swing	Duane
Follow	Arm swing	Duane
Follow	Arm swing	Duane
Follow	Arm swing	Duane
Follow	Arm swing	Duane
Follow	Arm swing	Duane
Follow	Arm swing	Duane
Follow	Arm swing	Duane
Follow	Arm swing	Duane
Follow	Arm swing	Duane
Follow	Arm swing	Duane
Follow	Arm swing	Duane
Follow	Arm swing	Duane
Follow	Arm swing	Duane
Follow	Arm swing	Duane
Follow	Arm swing	Duane
Follow	Arm swing	Duane
Follow	Arm swing	Duane
Follow	Arm swing	Duane
Follow	Arm swing	Duane
Follow	Arm swing	Duane
Follow	Arm swing	Duane
Follow	Arm swing	Duane
Follow	Arm swing	Duane
Follow	Arm wave	Duane
Follow	Big Loud Scratch	Musa
Follow	Big Loud Scratch	Musa
Follow	Big Loud Scratch	Musa
Follow	Directed push	Nambi
Follow	Embrace	Nambi
Follow	Head nod	Duane
Follow	Jump	Duane
Follow	Jump	Duane
Follow	Jump	Duane
Follow	Jump	Duane
Follow	Jump	Duane
Follow	Jump	Duane
Follow	Jump	Duane
Follow	Jump	Duane
Follow	Jump	Duane
Follow	Jump	Duane
Follow	Jump	Duane
Follow	Jump	Duane
Follow	Jump	Duane
Follow	Jump	Duane
Follow	Knock object	Musa
Follow	Leg swing	Duane
Follow	Leg swing	Duane
Follow	Object move	Duane
Follow	Object move	Duane
Follow	Object move	Duane
Follow	Object move	Duane
Follow	Object move	Duane
Follow	Object move	Duane
Follow	Object move	Duane
Follow	Object move	Duane
Follow	Object move	Duane
Follow	Object move	Duane
Follow	Object move	Duane
Follow	Object move	Duane
Follow	Object move	Duane
Follow	Object move	Duane
Follow	Object move	Duane
Follow	Object move	Duane
Follow	Object move	Duane
Follow	Object move	Duane
Follow	Object move	Duane
Follow	Object move	Duane
Follow	Object move	Duane
Follow	Object move	Duane
Follow	Object move	Duane
Follow	Object move	Duane
Follow	Object move	Duane
Follow	Object move	Duane
Follow	Object move	Duane
Follow	Object move	Duane
Follow	Object move	Nick
Follow	Object move	Nick
Follow	Object move	Nick
Follow	Object move	Nick
Follow	Object move	Nick
Follow	Object move	Nick
Follow	Object move	Nick
Follow	Object move	Nick
Follow	Object move	Nick
Follow	Object move	Nick
Follow	Object shake	Duane
Follow	Object shake	Duane
Follow	Object shake	Duane
Follow	Object shake	Duane
Follow	Object shake	Duane
Follow	Object shake	Duane
Follow	Object shake	Duane
Follow	Object shake	Duane
Follow	Object shake	Duane
Follow	Object shake	Duane
Follow	Object shake	Duane
Follow	Object shake	Duane
Follow	Object shake	Duane
Follow	Object shake	Duane
Follow	Object shake	Duane
Follow	Object shake	Duane
Follow	Object shake	Duane
Follow	Object shake	Duane
Follow	Object shake	Duane
Follow	Object shake	Duane
Follow	Object shake	Duane
Follow	Object shake	Duane
Follow	Object shake	Duane
Follow	Object shake	Duane
Follow	Object shake	Duane
Follow	Object shake	Duane
Follow	Object shake	Duane
Follow	Object shake	Duane
Follow	Object shake	Duane
Follow	Object shake	Duane
Follow	Object shake	Duane
Follow	Object shake	Duane
Follow	Object shake	Duane
Follow	Object shake	Duane
Follow	Object shake	Duane
Follow	Object shake	Duane
Follow	Object shake	Duane
Follow	Object shake	Duane
Follow	Object shake	Duane
Follow	Object shake	Duane
Follow	Object shake	Duane
Follow	Object shake	Duane
Follow	Object shake	Duane
Follow	Object shake	Duane
Follow	Object shake	Duane
Follow	Object shake	Duane
Follow	Object shake	Duane
Follow	Object shake	Duane
Follow	Object shake	Duane
Follow	Object shake	Duane
Follow	Object shake	Duane
Follow	Object shake	Duane
Follow	Object shake	Duane
Follow	Object shake	Duane
Follow	Object shake	Duane
Follow	Object shake	Duane
Follow	Object shake	Duane
Follow	Object shake	Duane
Follow	Object shake	Duane
Follow	Object shake	Duane
Follow	Object shake	Duane
Follow	Object shake	Duane
Follow	Object shake	Duane
Follow	Object shake	Duane
Follow	Object shake	Duane
Follow	Object shake	Duane
Follow	Object shake	Duane
Follow	Object shake	Duane
Follow	Object shake	Duane
Follow	Object shake	Duane
Follow	Object shake	Duane
Follow	Object shake	Duane
Follow	Object shake	Duane
Follow	Object shake	Duane
Follow	Object shake	Duane
Follow	Object shake	Duane
Follow	Object shake	Duane
Follow	Object shake	Duane
Follow	Object shake	Duane
Follow	Object shake	Duane
Follow	Object shake	Duane
Follow	Object shake	Duane
Follow	Object shake	Duane
Follow	Object shake	Duane
Follow	Object shake	Duane
Follow	Object shake	Duane
Follow	Object shake	Duane
Follow	Object shake	Duane
Follow	Object shake	Duane
Follow	Object shake	Duane
Follow	Object shake	Duane
Follow	Object shake	Duane
Follow	Object shake	Duane
Follow	Object shake	Duane
Follow	Object shake	Duane
Follow	Object shake	Duane
Follow	Object shake	Duane
Follow	Object shake	Duane
Follow	Object shake	Duane
Follow	Object shake	Duane
Follow	Object shake	Duane
Follow	Object shake	Duane
Follow	Object shake	Duane
Follow	Object shake	Duane
Follow	Object shake	Duane
Follow	Object shake	Duane
Follow	Object shake	Duane
Follow	Object shake	Duane
Follow	Object shake	Duane
Follow	Object shake	Duane
Follow	Object shake	Duane
Follow	Object shake	Duane
Follow	Object shake	Duane
Follow	Object shake	Duane
Follow	Object shake	Duane
Follow	Object shake	Duane
Follow	Object shake	Duane
Follow	Object shake	Duane
Follow	Object shake	Duane
Follow	Object shake	Duane
Follow	Object shake	Duane
Follow	Object shake	Duane
Follow	Object shake	Duane
Follow	Object shake	Duane
Follow	Object shake	Duane
Follow	Object shake	Duane
Follow	Object shake	Duane
Follow	Object shake	Duane
Follow	Object shake	Duane
Follow	Object shake	Duane
Follow	Object shake	Duane
Follow	Object shake	Duane
Follow	Object shake	Duane
Follow	Object shake	Duane
Follow	Object shake	Duane
Follow	Object shake	Duane
Follow	Object shake	Duane
Follow	Object shake	Duane
Follow	Object shake	Duane
Follow	Object shake	Duane
Follow	Object shake	Duane
Follow	Object shake	Duane
Follow	Object shake	Duane
Follow	Object shake	Duane
Follow	Object shake	Duane
Follow	Object shake	Duane
Follow	Object shake	Duane
Follow	Object shake	Duane
Follow	Object shake	Duane
Follow	Object shake	Duane
Follow	Object shake	Duane
Follow	Object shake	Duane
Follow	Object shake	Duane
Follow	Object shake	Duane
Follow	Object shake	Duane
Follow	Object shake	Duane
Follow	Object shake	Duane
Follow	Object shake	Duane
Follow	Object shake	Duane
Follow	Object shake	Duane
Follow	Object shake	Duane
Follow	Object shake	Duane
Follow	Object shake	Duane
Follow	Object shake	Duane
Follow	Object shake	Duane
Follow	Object shake	Duane
Follow	Object shake	Duane
Follow	Object shake	Duane
Follow	Object shake	Duane
Follow	Object shake	Duane
Follow	Object shake	Duane
Follow	Object shake	Duane
Follow	Object shake	Duane
Follow	Object shake	Duane
Follow	Object shake	Duane
Follow	Object shake	Duane
Follow	Object shake	Duane
Follow	Object shake	Duane
Follow	Object shake	Duane
Follow	Object shake	Duane
Follow	Object shake	Duane
Follow	Object shake	Duane
Follow	Object shake	Duane
Follow	Object shake	Duane
Follow	Object shake	Duane
Follow	Object shake	Duane
Follow	Object shake	Duane
Follow	Object shake	Duane
Follow	Object shake	Duane
Follow	Object shake	Duane
Follow	Object shake	Duane
Follow	Object shake	Duane
Follow	Object shake	Duane
Follow	Object shake	Duane
Follow	Object shake	Duane
Follow	Object shake	Duane
Follow	Object shake	Duane
Follow	Object shake	Duane
Follow	Object shake	Duane
Follow	Object shake	Duane
Follow	Object shake	Duane
Follow	Object shake	Duane
Follow	Object shake	Duane
Follow	Object shake	Duane
Follow	Object shake	Duane
Follow	Object shake	Duane
Follow	Object shake	Duane
Follow	Object shake	Duane
Follow	Object shake	Duane
Follow	Object shake	Duane
Follow	Object shake	Duane
Follow	Object shake	Duane
Follow	Object shake	Duane
Follow	Object shake	Duane
Follow	Object shake	Duane
Follow	Object shake	Duane
Follow	Object shake	Duane
Follow	Object shake	Nick
Follow	Object shake	Nick
Follow	Object shake	Nick
Follow	Present (sexual)	Nambi
Follow	Punch object/ground	Duane
Follow	Rump rub	Nick
Follow	Slap object	Duane
Follow	Slap object	Duane
Follow	Slap object	Duane
Follow	Slap object	Duane
Follow	Slap object	Duane
Follow	Slap object	Duane
Follow	Slap object	Duane
Follow	Slap object	Duane
Follow	Slap object	Duane
Follow	Slap object	Duane
Follow	Slap object	Duane
Follow	Slap object	Duane
Follow	Slap object	Duane
Follow	Slap object	Duane
Follow	Slap object	Duane
Follow	Slap object	Duane
Follow	Slap object	Duane
Follow	Slap object	Duane
Follow	Slap object	Duane
Follow	Slap object	Duane
Follow	Slap object	Duane
Follow	Slap object	Duane
Follow	Slap object with object	Duane
Follow	Slap object with object	Duane
Follow	Slap object with object	Duane
Follow	Slap object with object	Duane
Follow	Slap object with object	Duane
Follow	Slap object with object	Duane
Follow	Slap object with object	Duane
Follow	Slap object with object	Duane
Follow	Slap object with object	Duane
Follow	Slap object with object	Duane
Follow	Slap object with object	Duane
Follow	Slap object with object	Duane
Follow	Slap object with object	Duane
Follow	Slap object with object	Duane
Follow	Stomp	Duane
Follow	Stomp	Duane
Follow	Stomp	Duane
Follow	Stomp	Duane
Follow	Stomp	Duane
Follow	Stomp	Duane
Follow	Stomp	Duane
Follow	Stomp	Duane
Follow	Stomp	Duane
Follow	Stomp	Duane
Follow	Stomp	Duane
Follow	Stomp 2-feet	Duane
Follow	Stomp 2-feet	Duane
Follow	Stomp 2-feet	Duane
Follow	Stomp 2-feet	Musa
Follow	Throw object	Duane
Follow	Throw object	Duane
Follow	Throw object	Duane
Follow	Throw object	Duane
Follow	Throw object	Duane
Groom	Big Loud Scratch	Bahati
Groom	Big Loud Scratch	Bahati
Groom	Big Loud Scratch	Bahati
Groom	Big Loud Scratch	Bahati
Groom	Big Loud Scratch	Beti
Groom	Big Loud Scratch	Beti
Groom	Big Loud Scratch	Beti
Groom	Big Loud Scratch	Beti
Groom	Big Loud Scratch	Beti
Groom	Big Loud Scratch	Beti
Groom	Big Loud Scratch	Beti
Groom	Big Loud Scratch	Beti
Groom	Big Loud Scratch	Bwoba
Groom	Big Loud Scratch	Duane
Groom	Big Loud Scratch	Duane
Groom	Big Loud Scratch	Frank
Groom	Big Loud Scratch	Frank
Groom	Big Loud Scratch	Frank
Groom	Big Loud Scratch	Hawa
Groom	Big Loud Scratch	Hawa
Groom	Big Loud Scratch	Hawa
Groom	Big Loud Scratch	Hawa
Groom	Big Loud Scratch	Hawa
Groom	Big Loud Scratch	Hawa
Groom	Big Loud Scratch	Hawa
Groom	Big Loud Scratch	Hawa
Groom	Big Loud Scratch	Hawa
Groom	Big Loud Scratch	Hawa
Groom	Big Loud Scratch	Hawa
Groom	Big Loud Scratch	Hawa
Groom	Big Loud Scratch	Hawa
Groom	Big Loud Scratch	Hawa
Groom	Big Loud Scratch	Janet
Groom	Big Loud Scratch	Janet
Groom	Big Loud Scratch	Kalema
Groom	Big Loud Scratch	Kalema
Groom	Big Loud Scratch	Kalema
Groom	Big Loud Scratch	Kalema
Groom	Big Loud Scratch	Kalema
Groom	Big Loud Scratch	Kana
Groom	Big Loud Scratch	Karibu
Groom	Big Loud Scratch	Karo
Groom	Big Loud Scratch	Karo
Groom	Big Loud Scratch	Karo
Groom	Big Loud Scratch	Karo
Groom	Big Loud Scratch	Karo
Groom	Big Loud Scratch	Kasigwa
Groom	Big Loud Scratch	Kasigwa
Groom	Big Loud Scratch	Kato
Groom	Big Loud Scratch	Kato
Groom	Big Loud Scratch	Kato
Groom	Big Loud Scratch	Kato
Groom	Big Loud Scratch	Kato
Groom	Big Loud Scratch	Kato
Groom	Big Loud Scratch	Kato
Groom	Big Loud Scratch	Kato
Groom	Big Loud Scratch	Kato
Groom	Big Loud Scratch	Kato
Groom	Big Loud Scratch	Kato
Groom	Big Loud Scratch	Kato
Groom	Big Loud Scratch	Kato
Groom	Big Loud Scratch	Kumi
Groom	Big Loud Scratch	Kumi
Groom	Big Loud Scratch	Kumi
Groom	Big Loud Scratch	Kumi
Groom	Big Loud Scratch	Kumi
Groom	Big Loud Scratch	Kumi
Groom	Big Loud Scratch	Kumi
Groom	Big Loud Scratch	Kumi
Groom	Big Loud Scratch	Kutu
Groom	Big Loud Scratch	Kutu
Groom	Big Loud Scratch	Kwera
Groom	Big Loud Scratch	Kwera
Groom	Big Loud Scratch	Maani
Groom	Big Loud Scratch	Nambi
Groom	Big Loud Scratch	Nick
Groom	Big Loud Scratch	Nick
Groom	Big Loud Scratch	Nick
Groom	Big Loud Scratch	Nick
Groom	Big Loud Scratch	Nick
Groom	Big Loud Scratch	Nick
Groom	Big Loud Scratch	Nick
Groom	Big Loud Scratch	Nick
Groom	Big Loud Scratch	Nick
Groom	Big Loud Scratch	Nick
Groom	Big Loud Scratch	Nick
Groom	Big Loud Scratch	Nick
Groom	Big Loud Scratch	Nick
Groom	Big Loud Scratch	Nick
Groom	Big Loud Scratch	Nick
Groom	Big Loud Scratch	Nick
Groom	Big Loud Scratch	Nick
Groom	Big Loud Scratch	Nick
Groom	Big Loud Scratch	Nick
Groom	Big Loud Scratch	Nick
Groom	Big Loud Scratch	Night
Groom	Big Loud Scratch	Night
Groom	Big Loud Scratch	Nora
Groom	Big Loud Scratch	Nora
Groom	Big Loud Scratch	Rachel
Groom	Big Loud Scratch	Squibs
Groom	Big Loud Scratch	Squibs
Groom	Big Loud Scratch	Squibs
Groom	Big Loud Scratch	Squibs
Groom	Big Loud Scratch	Zak
Groom	Big Loud Scratch	Zak
Groom	Big Loud Scratch	Zak
Groom	Big Loud Scratch	Zak
Groom	Big Loud Scratch	Zak
Groom	Big Loud Scratch	Zak
Groom	Big Loud Scratch	Zak
Groom	Big Loud Scratch	Zak
Groom	Big Loud Scratch	Zak
Groom	Big Loud Scratch	Zak
Groom	Big Loud Scratch	Zak
Groom	Big Loud Scratch	Zak
Groom	Big Loud Scratch	Zak
Groom	Big Loud Scratch	Zak
Groom	Big Loud Scratch	Zak
Groom	Big Loud Scratch	Zak
Groom	Big Loud Scratch	Zak
Groom	Big Loud Scratch	Zak
Groom	Big Loud Scratch	Zalu
Groom	Big Loud Scratch	Zalu
Groom	Big Loud Scratch	Zalu
Groom	Big Loud Scratch	Zalu
Groom	Big Loud Scratch	Zalu
Groom	Big Loud Scratch	Zalu
Groom	Big Loud Scratch	Zalu
Groom	Big Loud Scratch	Zalu
Groom	Big Loud Scratch	Zalu
Groom	Big Loud Scratch	Zalu
Groom	Big Loud Scratch	Zalu
Groom	Big Loud Scratch	Zed
Groom	Big Loud Scratch	Zefa
Groom	Big Loud Scratch	Zefa
Groom	Big Loud Scratch	Zefa
Groom	Big Loud Scratch	Zefa
Groom	Big Loud Scratch	Zefa
Groom	Big Loud Scratch	Zefa
Groom	Big Loud Scratch	Zefa
Groom	Big Loud Scratch	Zefa
Groom	Big Loud Scratch	Zefa
Groom	Big Loud Scratch	Zefa
Groom	Big Loud Scratch	Zefa
Groom	Big Loud Scratch	Zefa
Groom	Big Loud Scratch	Zefa
Groom	Big Loud Scratch	Zefa
Groom	Big Loud Scratch	Zefa
Groom	Big Loud Scratch	Zefa
Groom	Big Loud Scratch	Zefa
Groom	Big Loud Scratch	Zefa
Groom	Big Loud Scratch	Zefa
Groom	Big Loud Scratch	Zefa
Groom	Big Loud Scratch	Zefa
Groom	Big Loud Scratch	Zefa
Groom	Big Loud Scratch	Zefa
Groom	Big Loud Scratch	Zig
Groom	Big Loud Scratch	Zig
Groom	Big Loud Scratch	Zig
Groom	Big Loud Scratch	Zig
Groom	Big Loud Scratch	Zimba
Groom	Bite	Zefa
Groom	Directed push	Zak
Groom	Embrace	Nambi
Groom	Grab	Karibu
Groom	Head nod	Duane
Groom	Object shake	Duane
Groom	Object shake	Kato
Groom	Present (grooming)	Bahati
Groom	Present (grooming)	Bahati
Groom	Present (grooming)	Bahati
Groom	Present (grooming)	Bahati
Groom	Present (grooming)	Bahati
Groom	Present (grooming)	Bahati
Groom	Present (grooming)	Bahati
Groom	Present (grooming)	Beti
Groom	Present (grooming)	Beti
Groom	Present (grooming)	Beti
Groom	Present (grooming)	Bwoba
Groom	Present (grooming)	Bwoba
Groom	Present (grooming)	Duane
Groom	Present (grooming)	Duane
Groom	Present (grooming)	Duane
Groom	Present (grooming)	Fred
Groom	Present (grooming)	Fred
Groom	Present (grooming)	Fred
Groom	Present (grooming)	Hawa
Groom	Present (grooming)	Hawa
Groom	Present (grooming)	Hawa
Groom	Present (grooming)	Hawa
Groom	Present (grooming)	Hawa
Groom	Present (grooming)	Hawa
Groom	Present (grooming)	Hawa
Groom	Present (grooming)	Helen
Groom	Present (grooming)	Helen
Groom	Present (grooming)	Helen
Groom	Present (grooming)	Janet
Groom	Present (grooming)	Janet
Groom	Present (grooming)	Janie
Groom	Present (grooming)	Janie
Groom	Present (grooming)	Janie
Groom	Present (grooming)	Janie
Groom	Present (grooming)	Kalema
Groom	Present (grooming)	Kalema
Groom	Present (grooming)	Kalema
Groom	Present (grooming)	Kana
Groom	Present (grooming)	Kana
Groom	Present (grooming)	Kana
Groom	Present (grooming)	Kana
Groom	Present (grooming)	Kana
Groom	Present (grooming)	Kana
Groom	Present (grooming)	Karibu
Groom	Present (grooming)	Karo
Groom	Present (grooming)	Karo
Groom	Present (grooming)	Kasigwa
Groom	Present (grooming)	Kasigwa
Groom	Present (grooming)	Kasigwa
Groom	Present (grooming)	Kasigwa
Groom	Present (grooming)	Kasigwa
Groom	Present (grooming)	Kasigwa
Groom	Present (grooming)	Kato
Groom	Present (grooming)	Kato
Groom	Present (grooming)	Kato
Groom	Present (grooming)	Kato
Groom	Present (grooming)	Kato
Groom	Present (grooming)	Kato
Groom	Present (grooming)	Kato
Groom	Present (grooming)	Kato
Groom	Present (grooming)	Kato
Groom	Present (grooming)	Kato
Groom	Present (grooming)	Kumi
Groom	Present (grooming)	Kumi
Groom	Present (grooming)	Kumi
Groom	Present (grooming)	Kumi
Groom	Present (grooming)	Kumi
Groom	Present (grooming)	Kutu
Groom	Present (grooming)	Kutu
Groom	Present (grooming)	Kwera
Groom	Present (grooming)	Kwera
Groom	Present (grooming)	Kwera
Groom	Present (grooming)	Kwezi
Groom	Present (grooming)	Kwezi
Groom	Present (grooming)	Kwezi
Groom	Present (grooming)	Maani
Groom	Present (grooming)	Maani
Groom	Present (grooming)	Mukwano
Groom	Present (grooming)	Mukwano
Groom	Present (grooming)	Mukwano
Groom	Present (grooming)	Mukwano
Groom	Present (grooming)	Musa
Groom	Present (grooming)	Musa
Groom	Present (grooming)	Musa
Groom	Present (grooming)	Musa
Groom	Present (grooming)	Nambi
Groom	Present (grooming)	Nick
Groom	Present (grooming)	Nick
Groom	Present (grooming)	Nick
Groom	Present (grooming)	Night
Groom	Present (grooming)	Nora
Groom	Present (grooming)	Nora
Groom	Present (grooming)	Nora
Groom	Present (grooming)	Nora
Groom	Present (grooming)	Nora
Groom	Present (grooming)	Nora
Groom	Present (grooming)	Nora
Groom	Present (grooming)	Nora
Groom	Present (grooming)	Nora
Groom	Present (grooming)	Nora
Groom	Present (grooming)	Nora
Groom	Present (grooming)	Rachel
Groom	Present (grooming)	Rachel
Groom	Present (grooming)	Rachel
Groom	Present (grooming)	Rachel
Groom	Present (grooming)	Rachel
Groom	Present (grooming)	Rachel
Groom	Present (grooming)	Rachel
Groom	Present (grooming)	Rachel
Groom	Present (grooming)	Rachel
Groom	Present (grooming)	Squibs
Groom	Present (grooming)	Squibs
Groom	Present (grooming)	Squibs
Groom	Present (grooming)	Squibs
Groom	Present (grooming)	Tinka
Groom	Present (grooming)	Tinka
Groom	Present (grooming)	Tinka
Groom	Present (grooming)	Tinka
Groom	Present (grooming)	Wilma
Groom	Present (grooming)	Wilma
Groom	Present (grooming)	Wilma
Groom	Present (grooming)	Zak
Groom	Present (grooming)	Zak
Groom	Present (grooming)	Zak
Groom	Present (grooming)	Zak
Groom	Present (grooming)	Zak
Groom	Present (grooming)	Zak
Groom	Present (grooming)	Zak
Groom	Present (grooming)	Zalu
Groom	Present (grooming)	Zalu
Groom	Present (grooming)	Zalu
Groom	Present (grooming)	Zalu
Groom	Present (grooming)	Zalu
Groom	Present (grooming)	Zalu
Groom	Present (grooming)	Zalu
Groom	Present (grooming)	Zalu
Groom	Present (grooming)	Zalu
Groom	Present (grooming)	Zalu
Groom	Present (grooming)	Zalu
Groom	Present (grooming)	Zalu
Groom	Present (grooming)	Zalu
Groom	Present (grooming)	Zed
Groom	Present (grooming)	Zed
Groom	Present (grooming)	Zed
Groom	Present (grooming)	Zed
Groom	Present (grooming)	Zed
Groom	Present (grooming)	Zed
Groom	Present (grooming)	Zed
Groom	Present (grooming)	Zed
Groom	Present (grooming)	Zed
Groom	Present (grooming)	Zed
Groom	Present (grooming)	Zed
Groom	Present (grooming)	Zed
Groom	Present (grooming)	Zed
Groom	Present (grooming)	Zed
Groom	Present (grooming)	Zed
Groom	Present (grooming)	Zed
Groom	Present (grooming)	Zed
Groom	Present (grooming)	Zed
Groom	Present (grooming)	Zefa
Groom	Present (grooming)	Zefa
Groom	Present (grooming)	Zefa
Groom	Present (grooming)	Zefa
Groom	Present (grooming)	Zefa
Groom	Present (grooming)	Zefa
Groom	Present (grooming)	Zefa
Groom	Present (grooming)	Zimba
Groom	Present (grooming)	Zimba
Groom	Present (grooming)	Zimba
Groom	Present (sexual)	Nora
Groom	Reach	Night
Groom	Touch other	Beti
Groom	Touch other	Kato
Initiate copulation	Directed push	Kwezi
Initiate copulation	Drum object (palms)	James
Initiate copulation	Drum object (palms)	Zak
Initiate copulation	Leaf clipping	Hawa
Initiate copulation	Leaf clipping	Hawa
Initiate copulation	Leaf clipping	Hawa
Initiate copulation	Leaf clipping	Kato
Initiate copulation	Leaf clipping	Kato
Initiate copulation	Leaf clipping	Kato
Initiate copulation	Leaf clipping	Kato
Initiate copulation	Leaf clipping	Kato
Initiate copulation	Leaf clipping	Kato
Initiate copulation	Leaf clipping	Kato
Initiate copulation	Leaf clipping	Kato
Initiate copulation	Leaf clipping	Kato
Initiate copulation	Leaf clipping	Kato
Initiate copulation	Leaf clipping	Kwezi
Initiate copulation	Leaf clipping	Kwezi
Initiate copulation	Leaf clipping	Kwezi
Initiate copulation	Leaf clipping	Kwezi
Initiate copulation	Leaf clipping	Kwezi
Initiate copulation	Leaf clipping	Musa
Initiate copulation	Leaf clipping	Musa
Initiate copulation	Leaf clipping	Nick
Initiate copulation	Leaf clipping	Nick
Initiate copulation	Leaf clipping	Nick
Initiate copulation	Leaf clipping	Oakland
Initiate copulation	Leaf clipping	Pascal
Initiate copulation	Leaf clipping	Zalu
Initiate copulation	Leaf clipping	Zalu
Initiate copulation	Leaf clipping	Zalu
Initiate copulation	Leaf clipping	Zig
Initiate copulation	Leaf clipping	Zig
Initiate copulation	Leaf clipping	Zig
Initiate copulation	Object move	Hawa
Initiate copulation	Object move	Hawa
Initiate copulation	Object move	James
Initiate copulation	Object move	Kwezi
Initiate copulation	Object move	Musa
Initiate copulation	Object move	Musa
Initiate copulation	Object move	Musa
Initiate copulation	Object move	Musa
Initiate copulation	Object move	Pascal
Initiate copulation	Object move	Pascal
Initiate copulation	Object shake	Frank
Initiate copulation	Object shake	Fred
Initiate copulation	Object shake	Fred
Initiate copulation	Object shake	Hawa
Initiate copulation	Object shake	Hawa
Initiate copulation	Object shake	Hawa
Initiate copulation	Object shake	James
Initiate copulation	Object shake	James
Initiate copulation	Object shake	James
Initiate copulation	Object shake	Kato
Initiate copulation	Object shake	Kato
Initiate copulation	Object shake	Kato
Initiate copulation	Object shake	Kato
Initiate copulation	Object shake	Kato
Initiate copulation	Object shake	Kato
Initiate copulation	Object shake	Kato
Initiate copulation	Object shake	Kato
Initiate copulation	Object shake	Kato
Initiate copulation	Object shake	Kwezi
Initiate copulation	Object shake	Kwezi
Initiate copulation	Object shake	Kwezi
Initiate copulation	Object shake	Kwezi
Initiate copulation	Object shake	Kwezi
Initiate copulation	Object shake	Kwezi
Initiate copulation	Object shake	Kwezi
Initiate copulation	Object shake	Kwezi
Initiate copulation	Object shake	Nick
Initiate copulation	Object shake	Nick
Initiate copulation	Object shake	Nick
Initiate copulation	Object shake	Nick
Initiate copulation	Object shake	Nick
Initiate copulation	Object shake	Nick
Initiate copulation	Object shake	Zak
Initiate copulation	Object shake	Zak
Initiate copulation	Object shake	Zak
Initiate copulation	Object shake	Zak
Initiate copulation	Object shake	Zak
Initiate copulation	Object shake	Zalu
Initiate copulation	Object shake	Zalu
Initiate copulation	Present (sexual)	Bahati
Initiate copulation	Present (sexual)	Bahati
Initiate copulation	Present (sexual)	Bahati
Initiate copulation	Present (sexual)	Bahati
Initiate copulation	Present (sexual)	Harriet
Initiate copulation	Present (sexual)	Harriet
Initiate copulation	Present (sexual)	Harriet
Initiate copulation	Present (sexual)	Juliet
Initiate copulation	Present (sexual)	Juliet
Initiate copulation	Present (sexual)	Juliet
Initiate copulation	Present (sexual)	Juliet
Initiate copulation	Present (sexual)	Juliet
Initiate copulation	Present (sexual)	Juliet
Initiate copulation	Present (sexual)	Juliet
Initiate copulation	Present (sexual)	Karo
Initiate copulation	Present (sexual)	Karo
Initiate copulation	Present (sexual)	Karo
Initiate copulation	Present (sexual)	Kutu
Initiate copulation	Present (sexual)	Kutu
Initiate copulation	Present (sexual)	Kutu
Initiate copulation	Present (sexual)	Lola
Initiate copulation	Present (sexual)	Lola
Initiate copulation	Present (sexual)	Lola
Initiate copulation	Present (sexual)	Lola
Initiate copulation	Present (sexual)	Lola
Initiate copulation	Present (sexual)	Lola
Initiate copulation	Present (sexual)	Lola
Initiate copulation	Present (sexual)	Lola
Initiate copulation	Present (sexual)	Lola
Initiate copulation	Present (sexual)	Lola
Initiate copulation	Present (sexual)	Nambi
Initiate copulation	Present (sexual)	Nambi
Initiate copulation	Present (sexual)	Nambi
Initiate copulation	Present (sexual)	Nambi
Initiate copulation	Present (sexual)	Nambi
Initiate copulation	Present (sexual)	Nambi
Initiate copulation	Present (sexual)	Nambi
Initiate copulation	Present (sexual)	Nambi
Initiate copulation	Present (sexual)	Nambi
Initiate copulation	Present (sexual)	Nambi
Initiate copulation	Present (sexual)	Nambi
Initiate copulation	Present (sexual)	Nambi
Initiate copulation	Present (sexual)	Nambi
Initiate copulation	Present (sexual)	Nambi
Initiate copulation	Present (sexual)	Nambi
Initiate copulation	Present (sexual)	Nambi
Initiate copulation	Present (sexual)	Nambi
Initiate copulation	Present (sexual)	Nambi
Initiate copulation	Present (sexual)	Nambi
Initiate copulation	Present (sexual)	Nambi
Initiate copulation	Present (sexual)	Nambi
Initiate copulation	Present (sexual)	Nambi
Initiate copulation	Present (sexual)	Nambi
Initiate copulation	Present (sexual)	Nambi
Initiate copulation	Present (sexual)	Nambi
Initiate copulation	Present (sexual)	Nora
Initiate copulation	Present (sexual)	Nora
Initiate copulation	Present (sexual)	Nora
Initiate copulation	Present (sexual)	Nora
Initiate copulation	Present (sexual)	Nora
Initiate copulation	Present (sexual)	Nora
Initiate copulation	Present (sexual)	Nora
Initiate copulation	Present (sexual)	Nora
Initiate copulation	Present (sexual)	Nora
Initiate copulation	Present (sexual)	Nora
Initiate copulation	Present (sexual)	Nora
Initiate copulation	Present (sexual)	Nora
Initiate copulation	Present (sexual)	Oakland
Initiate copulation	Present (sexual)	Oakland
Initiate copulation	Present (sexual)	Oakland
Initiate copulation	Present (sexual)	Oakland
Initiate copulation	Present (sexual)	Oakland
Initiate copulation	Present (sexual)	Oakland
Initiate copulation	Present (sexual)	Rachel
Initiate copulation	Present (sexual)	Rachel
Initiate copulation	Present (sexual)	Rachel
Initiate copulation	Present (sexual)	Rachel
Initiate copulation	Present (sexual)	Rachel
Initiate copulation	Present (sexual)	Rachel
Initiate copulation	Present (sexual)	Rachel
Initiate copulation	Present (sexual)	Rachel
Initiate copulation	Present (sexual)	Rachel
Initiate copulation	Present (sexual)	Rachel
Initiate copulation	Present (sexual)	Rachel
Initiate copulation	Present (sexual)	Rachel
Initiate copulation	Present (sexual)	Rachel
Initiate copulation	Present (sexual)	Wilma
Initiate copulation	Present (sexual)	Wilma
Initiate copulation	Present (sexual)	Wilma
Initiate copulation	Present (sexual)	Wilma
Initiate copulation	Present (sexual)	Zalu
Initiate copulation	Present (sexual)	Zimba
Initiate copulation	Present (sexual)	Zimba
Initiate copulation	Present (sexual)	Zimba
Initiate copulation	Present (sexual)	Zimba
Initiate copulation	Punch object/ground	Hawa
Initiate copulation	Punch object/ground	Musa
Initiate copulation	Reach	Frank
Initiate copulation	Reach	Fred
Initiate copulation	Reach	Nick
Initiate copulation	Reach	Zalu
Initiate copulation	Reach	Zalu
Initiate copulation	Slap object	Kato
Initiate copulation	Slap object	Kato
Initiate copulation	Slap object	Kwezi
Initiate copulation	Slap object	Kwezi
Initiate copulation	Slap object	Kwezi
Initiate copulation	Slap object	Kwezi
Initiate copulation	Slap other	Zak
Initiate copulation	Stomp	Frank
Initiate copulation	Stomp	James
Initiate copulation	Stomp	Kwezi
Initiate copulation	Stomp	Pascal
Initiate copulation	Stomp	Pascal
Move away	Arm raise	Bahati
Move away	Arm raise	Kasigwa
Move away	Arm raise	Nora
Move away	Arm raise	Nora
Move away	Arm raise	Sharlot
Move away	Arm swing	Frank
Move away	Arm swing	Mukwano
Move away	Arm swing	Nick
Move away	Arm swing	Rose
Move away	Arm swing	Rose
Move away	Directed push	Harriet
Move away	Directed push	Harriet
Move away	Directed push	Harriet
Move away	Directed push	Kewaya
Move away	Directed push	Kewaya
Move away	Directed push	Nambi
Move away	Directed push	Nambi
Move away	Directed push	Nambi
Move away	Directed push	Nambi
Move away	Directed push	Nambi
Move away	Directed push	Zalu
Move away	Directed push	Zefa
Move away	Gallop	Katia
Move away	Grab	Kalema
Move away	Grab	Zed
Move away	Grab-pull	Klauce
Move away	Hand fling	Bahati
Move away	Hand fling	Bahati
Move away	Hand fling	Bahati
Move away	Hand fling	Bahati
Move away	Hand fling	Bahati
Move away	Hand fling	Frank
Move away	Hand fling	Juliet
Move away	Hand fling	Kana
Move away	Hand fling	Kumi
Move away	Hand fling	Kutu
Move away	Hand fling	Kutu
Move away	Hand fling	Kutu
Move away	Hand fling	Kutu
Move away	Hand fling	Mukwano
Move away	Hand fling	Nick
Move away	Hand fling	Nick
Move away	Hand fling	Nick
Move away	Hand fling	Nick
Move away	Hand fling	Nick
Move away	Hand fling	Nick
Move away	Hand fling	Nick
Move away	Hand fling	Nick
Move away	Hand fling	Nick
Move away	Hand fling	Nick
Move away	Hand fling	Nick
Move away	Hand fling	Nick
Move away	Hand fling	Nick
Move away	Hand fling	Nick
Move away	Hand fling	Nick
Move away	Hand fling	Nick
Move away	Hand fling	Nick
Move away	Hand fling	Nick
Move away	Hand fling	Nora
Move away	Hand fling	Nora
Move away	Hand fling	Nora
Move away	Hand fling	Nora
Move away	Hand fling	Ruhara
Move away	Hand fling	Ruhara
Move away	Hand fling	Zed
Move away	Hand fling	Zefa
Move away	Hand fling	Zefa
Move away	Hand fling	Zefa
Move away	Hand fling	Zefa
Move away	Hand fling	Zefa
Move away	Hand on	Nora
Move away	Hand on	Nora
Move away	Jump	Kwezi
Move away	Look	Janet
Move away	Object move	Nick
Move away	Object move	Nick
Move away	Object move	Nick
Move away	Object move	Nick
Move away	Object move	Nick
Move away	Object move	Nick
Move away	Object move	Nick
Move away	Object move	Sharlot
Move away	Object move	Zak
Move away	Object move	Zig
Move away	Object shake	Duane
Move away	Object shake	Duane
Move away	Object shake	Frank
Move away	Object shake	Frank
Move away	Object shake	Hawa
Move away	Object shake	Hawa
Move away	Object shake	Kalema
Move away	Object shake	Kalema
Move away	Object shake	Kana
Move away	Object shake	Kumi
Move away	Object shake	Kumi
Move away	Object shake	Kumi
Move away	Object shake	Kumi
Move away	Object shake	Kwezi
Move away	Object shake	Kwezi
Move away	Object shake	Nick
Move away	Object shake	Nick
Move away	Object shake	Nick
Move away	Object shake	Nick
Move away	Object shake	Night
Move away	Object shake	Rose
Move away	Object shake	Zed
Move away	Object shake	Zed
Move away	Object shake	Zed
Move away	Object shake	Zefa
Move away	Object shake	Zig
Move away	Object shake	Zig
Move away	Punch object/ground	Duane
Move away	Punch object/ground	Nambi
Move away	Punch object/ground	Zak
Move away	Punch other	Janie
Move away	Punch other	Nambi
Move away	Punch other	Nora
Move away	Punch other	Zalu
Move away	Push	Klauce
Move away	Push	Night
Move away	Push	Zefa
Move away	Push	Zefa
Move away	Reach	Sharlot
Move away	Reach	Sharlot
Move away	Roll over	Sharlot
Move away	Slap object	Janet
Move away	Slap object	Kalema
Move away	Slap object	Kana
Move away	Slap object	Kana
Move away	Slap object	Kana
Move away	Slap object	Kasigwa
Move away	Slap object	Kasigwa
Move away	Slap object	Kumi
Move away	Slap object	Kwera
Move away	Slap object	Kwezi
Move away	Slap object	Kwezi
Move away	Slap object	Kwezi
Move away	Slap object	Kwezi
Move away	Slap object	Nick
Move away	Slap object	Nora
Move away	Slap object	Rose
Move away	Slap object	Rose
Move away	Slap object	Rose
Move away	Slap object	Sharlot
Move away	Slap object	Sharlot
Move away	Slap object	Sharlot
Move away	Slap object	Zig
Move away	Slap object	Zig
Move away	Slap object	Zig
Move away	Slap other	Kalema
Move away	Slap other	Kumi
Move away	Slap other	Nora
Move away	Slap other	Zak
Move away	Slap other	Zefa
Move away	Stomp	Frank
Move away	Stomp	Kana
Move away	Stomp	Kumi
Move away	Stomp	Kumi
Move away	Stomp	Kwezi
Move away	Stomp	Zed
Move away	Stomp 2-feet	Zed
Move away	Stomp 2-feet	Zed
Move away	Tap object	Rachel
Move away	Tap object	Rachel
Move away	Tap other	Mukwano
Move away	Tap other	Nambi
Move away	Tap other	Nambi
Move away	Tap other	Zed
Move away	Touch other	Zefa
Move away	Touch other	Zefa
Move closer	Arm raise	Harriet
Move closer	Arm raise	Monika
Move closer	Arm raise	Monika
Move closer	Arm raise	Monika
Move closer	Arm swing	Monika
Move closer	Arm swing	Night
Move closer	Arm swing	Zed
Move closer	Arm swing	Zed
Move closer	Beckon	Janie
Move closer	Beckon	Night
Move closer	Beckon	Nora
Move closer	Dangle	Zed
Move closer	Directed push	Harriet
Move closer	Directed push	Harriet
Move closer	Directed push	Harriet
Move closer	Directed push	Harriet
Move closer	Directed push	Harriet
Move closer	Directed push	Harriet
Move closer	Directed push	Harriet
Move closer	Directed push	Harriet
Move closer	Directed push	Harriet
Move closer	Directed push	Harriet
Move closer	Directed push	Harriet
Move closer	Directed push	Harriet
Move closer	Directed push	Harriet
Move closer	Directed push	Harriet
Move closer	Directed push	Harriet
Move closer	Directed push	Harriet
Move closer	Directed push	Harriet
Move closer	Directed push	Harriet
Move closer	Directed push	Harriet
Move closer	Directed push	Harriet
Move closer	Directed push	Harriet
Move closer	Directed push	Janie
Move closer	Directed push	Katia
Move closer	Directed push	Kigere
Move closer	Directed push	Kwera
Move closer	Directed push	Kwera
Move closer	Directed push	Nambi
Move closer	Directed push	Nambi
Move closer	Directed push	Nambi
Move closer	Directed push	Nambi
Move closer	Directed push	Nambi
Move closer	Directed push	Nambi
Move closer	Directed push	Night
Move closer	Directed push	Night
Move closer	Directed push	Ruhara
Move closer	Directed push	Wilma
Move closer	Directed push	Zimba
Move closer	Grab-pull	Harriet
Move closer	Grab-pull	Janet
Move closer	Grab-pull	Janie
Move closer	Grab-pull	Katia
Move closer	Grab-pull	Kwera
Move closer	Hand on	Harriet
Move closer	Hand on	Harriet
Move closer	Hand on	Harriet
Move closer	Hand on	Harriet
Move closer	Hand on	Harriet
Move closer	Hand on	Harriet
Move closer	Hand on	Harriet
Move closer	Hand on	Harriet
Move closer	Hand on	Harriet
Move closer	Hand on	Harriet
Move closer	Mouth stroke	Monika
Move closer	Mouth stroke	Monika
Move closer	Object move	Duane
Move closer	Object move	Duane
Move closer	Object move	Nick
Move closer	Object shake	Kato
Move closer	Object shake	Nick
Move closer	Object shake	Nick
Move closer	Object shake	Nick
Move closer	Object shake	Nick
Move closer	Poke	Zed
Move closer	Punch object/ground	Zig
Move closer	Punch object/ground	Zig
Move closer	Reach	Bwoba
Move closer	Reach	Harriet
Move closer	Reach	Karo
Move closer	Reach	Katia
Move closer	Reach	Katia
Move closer	Reach	Katia
Move closer	Reach	Monika
Move closer	Reach	Monika
Move closer	Reach	Monika
Move closer	Reach	Monika
Move closer	Reach	Monika
Move closer	Reach	Mukwano
Move closer	Reach	Nick
Move closer	Reach	Nick
Move closer	Reach	Night
Move closer	Reach	Zak
Move closer	Reach	Zalu
Move closer	Reach	Zed
Move closer	Slap object with object	Night
Move closer	Stomp	Zig
Move closer	Stomp	Zig
Move closer	Tap other	Janie
Move closer	Touch other	Kalema
Move closer	Touch other	Kalema
Move closer	Touch other	Kalema
Move closer	Touch other	Katia
Move closer	Touch other	Katia
Move closer	Touch other	Nambi
Move closer	Touch other	Pascal
Move closer	Touch other	Pascal
Position	Beckon	Night
Position	Directed push	Duane
Position	Directed push	Duane
Position	Directed push	Duane
Position	Directed push	Duane
Position	Directed push	Janie
Position	Directed push	Janie
Position	Directed push	Janie
Position	Directed push	Kalema
Position	Directed push	Kalema
Position	Directed push	Kalema
Position	Directed push	Kalema
Position	Directed push	Karo
Position	Directed push	Karo
Position	Directed push	Karo
Position	Directed push	Kasigwa
Position	Directed push	Kasigwa
Position	Directed push	Kasigwa
Position	Directed push	Kasigwa
Position	Directed push	Kwera
Position	Directed push	Kwera
Position	Directed push	Kwera
Position	Directed push	Kwera
Position	Directed push	Kwera
Position	Directed push	Kwera
Position	Directed push	Kwera
Position	Directed push	Kwera
Position	Directed push	Nambi
Position	Directed push	Nambi
Position	Directed push	Nambi
Position	Directed push	Nambi
Position	Directed push	Nambi
Position	Directed push	Nambi
Position	Directed push	Nambi
Position	Directed push	Nambi
Position	Directed push	Nambi
Position	Directed push	Nambi
Position	Directed push	Nambi
Position	Directed push	Nambi
Position	Directed push	Nambi
Position	Directed push	Nambi
Position	Directed push	Nambi
Position	Directed push	Nambi
Position	Directed push	Nambi
Position	Directed push	Nambi
Position	Directed push	Nambi
Position	Directed push	Nambi
Position	Directed push	Nambi
Position	Directed push	Nambi
Position	Directed push	Night
Position	Directed push	Night
Position	Directed push	Zak
Position	Directed push	Zak
Position	Directed push	Zak
Position	Directed push	Zak
Position	Directed push	Zak
Position	Directed push	Zak
Position	Directed push	Zak
Position	Directed push	Zak
Position	Directed push	Zak
Position	Directed push	Zalu
Position	Directed push	Zalu
Position	Directed push	Zalu
Position	Directed push	Zalu
Position	Directed push	Zalu
Position	Directed push	Zed
Position	Directed push	Zed
Position	Directed push	Zed
Position	Directed push	Zig
Position	Directed push	Zig
Position	Directed push	Zig
Position	Directed push	Zig
Position	Directed push	Zig
Position	Directed push	Zimba
Position	Directed push	Zimba
Position	Directed push	Zimba
Position	Grab	Karo
Position	Slap object	Janie
Position	Tap object	Zalu
Position	Tap object	Zalu
Stop behaviour	Arm raise	Karo
Stop behaviour	Arm raise	Night
Stop behaviour	Arm raise	Zefa
Stop behaviour	Arm swing	Kumi
Stop behaviour	Arm swing	Kumi
Stop behaviour	Arm swing	Night
Stop behaviour	Arm swing	Zig
Stop behaviour	Bite	Night
Stop behaviour	Bite	Night
Stop behaviour	Directed push	Janet
Stop behaviour	Foot present	Karo
Stop behaviour	Gallop	Night
Stop behaviour	Grab	Honey
Stop behaviour	Grab	James
Stop behaviour	Grab	Kalema
Stop behaviour	Grab	Klauce
Stop behaviour	Grab	Kwera
Stop behaviour	Grab	Kwera
Stop behaviour	Grab	Rachel
Stop behaviour	Grab	Rachel
Stop behaviour	Grab	Ruhara
Stop behaviour	Grab-pull	Harriet
Stop behaviour	Grab-pull	Janie
Stop behaviour	Hand fling	Kalema
Stop behaviour	Hand fling	Kalema
Stop behaviour	Hand fling	Katia
Stop behaviour	Hand fling	Kutu
Stop behaviour	Hand fling	Musa
Stop behaviour	Hand fling	Nick
Stop behaviour	Hand fling	Nick
Stop behaviour	Hand fling	Zig
Stop behaviour	Hand on	Bahati
Stop behaviour	Hand on	Harriet
Stop behaviour	Hand on	Honey
Stop behaviour	Hand on	Honey
Stop behaviour	Hand on	Juliet
Stop behaviour	Hand on	Kewaya
Stop behaviour	Hand on	Kwezi
Stop behaviour	Hand on	Kwezi
Stop behaviour	Hand on	Kwezi
Stop behaviour	Hand on	Nambi
Stop behaviour	Hand on	Nambi
Stop behaviour	Hand on	Nambi
Stop behaviour	Hand on	Nambi
Stop behaviour	Hand on	Nora
Stop behaviour	Hand on	Rachel
Stop behaviour	Hand on	Rachel
Stop behaviour	Hand on	Zalu
Stop behaviour	Jump	Kasigwa
Stop behaviour	Jump	Kasigwa
Stop behaviour	Jump	Kasigwa
Stop behaviour	Kick	Musa
Stop behaviour	Object shake	Kwera
Stop behaviour	Object shake	Nick
Stop behaviour	Object shake	Nick
Stop behaviour	Object shake	Nick
Stop behaviour	Object shake	Nick
Stop behaviour	Object shake	Nick
Stop behaviour	Object shake	Nick
Stop behaviour	Object shake	Nick
Stop behaviour	Object shake	Zed
Stop behaviour	Pirouette	Nora
Stop behaviour	Present (sexual)	Kutu
Stop behaviour	Punch other	Kwera
Stop behaviour	Punch other	Zefa
Stop behaviour	Push	Anna
Stop behaviour	Push	Janet
Stop behaviour	Push	Janie
Stop behaviour	Push	Janie
Stop behaviour	Push	Kalema
Stop behaviour	Push	Karo
Stop behaviour	Push	Karo
Stop behaviour	Push	Kato
Stop behaviour	Push	Kato
Stop behaviour	Push	Musa
Stop behaviour	Push	Nambi
Stop behaviour	Push	Zed
Stop behaviour	Push	Zed
Stop behaviour	Push	Zefa
Stop behaviour	Reach	Katia
Stop behaviour	Reach	Katia
Stop behaviour	Shake hands	Kato
Stop behaviour	Shake hands	Kato
Stop behaviour	Side roulade	James
Stop behaviour	Side roulade	Kumi
Stop behaviour	Side roulade	Kumi
Stop behaviour	Side roulade	Night
Stop behaviour	Side roulade	Night
Stop behaviour	Side roulade	Zak
Stop behaviour	Side roulade	Zak
Stop behaviour	Side roulade	Zak
Stop behaviour	Side roulade	Zak
Stop behaviour	Slap object	Duane
Stop behaviour	Slap object	Kana
Stop behaviour	Slap object	Karo
Stop behaviour	Slap object	Karo
Stop behaviour	Slap object	Kwezi
Stop behaviour	Slap object	Zefa
Stop behaviour	Slap object	Zefa
Stop behaviour	Slap other	Faida
Stop behaviour	Slap other	Kana
Stop behaviour	Slap other	Katia
Stop behaviour	Slap other	Katia
Stop behaviour	Slap other	Katia
Stop behaviour	Slap other	Kewaya
Stop behaviour	Slap other	Klauce
Stop behaviour	Slap other	Night
Stop behaviour	Slap other	Zalu
Stop behaviour	Slap other	Zed
Stop behaviour	Slap other	Zig
Stop behaviour	Somersault	Faida
Stop behaviour	Somersault	Janet
Stop behaviour	Somersault	Kumi
Stop behaviour	Somersault	Kumi
Stop behaviour	Somersault	Kumi
Stop behaviour	Somersault	Night
Stop behaviour	Somersault	Rachel
Stop behaviour	Somersault	Zak
Stop behaviour	Somersault	Zak
Stop behaviour	Somersault	Zak
Stop behaviour	Somersault	Zak
Stop behaviour	Somersault	Zak
Stop behaviour	Somersault	Zak
Stop behaviour	Somersault	Zak
Stop behaviour	Somersault	Zak
Stop behaviour	Stomp	Karo
Stop behaviour	Stomp	Karo
Stop behaviour	Stomp	Kasigwa
Stop behaviour	Stomp	Zed
Stop behaviour	Stomp 2-feet	Karo
Stop behaviour	Stomp 2-feet	Night
Stop behaviour	Stomp 2-feet	Zed
Stop behaviour	Stomp 2-feet	Zed
Stop behaviour	Tap other	Katia
Stop behaviour	Tap other	Kumi
Stop behaviour	Tap other	Kwera
Stop behaviour	Tap other	Nora
Stop behaviour	Tap other	Zefa
Stop behaviour	Tap other	Zefa
Stop behaviour	Touch other	Bahati
Stop behaviour	Touch other	Duane
Stop behaviour	Touch other	Kalema
Stop behaviour	Touch other	Kalema
Stop behaviour	Touch other	Karibu
Stop behaviour	Touch other	Kwera
Travel with me	Big Loud Scratch	Kalema
Travel with me	Big Loud Scratch	Kewaya
Travel with me	Big Loud Scratch	Kewaya
Travel with me	Big Loud Scratch	Kewaya
Travel with me	Big Loud Scratch	Kewaya
Travel with me	Big Loud Scratch	Kewaya
Travel with me	Big Loud Scratch	Kewaya
Travel with me	Big Loud Scratch	Kewaya
Travel with me	Big Loud Scratch	Kewaya
Travel with me	Big Loud Scratch	Kutu
Travel with me	Big Loud Scratch	Kwera
Travel with me	Big Loud Scratch	Kwera
Travel with me	Big Loud Scratch	Kwera
Travel with me	Big Loud Scratch	Kwera
Travel with me	Big Loud Scratch	Kwera
Travel with me	Big Loud Scratch	Kwera
Travel with me	Big Loud Scratch	Kwera
Travel with me	Big Loud Scratch	Kwera
Travel with me	Big Loud Scratch	Squibs
Travel with me	Big Loud Scratch	Squibs
Travel with me	Big Loud Scratch	Squibs
Travel with me	Big Loud Scratch	Squibs
Travel with me	Big Loud Scratch	Zefa
Travel with me	Big Loud Scratch	Zefa
Travel with me	Big Loud Scratch	Zefa
Travel with me	Big Loud Scratch	Zefa
Travel with me	Big Loud Scratch	Zefa
Travel with me	Big Loud Scratch	Zefa
Travel with me	Big Loud Scratch	Klauce
Travel with me	Directed push	Janie
Travel with me	Directed push	Janie
Travel with me	Directed push	Janie
Travel with me	Directed push	Janie
Travel with me	Embrace	Janie
Travel with me	Grab-pull	Klauce
Travel with me	Object move	Zefa
Travel with me	Object shake	Zefa
Travel with me	Poke	Faida
Travel with me	Touch other	Zefa

## Sheet: Bonobo matrix
	Acquire object/food	Climb on me	Contact	Follow me	Initiate copulation	Initiate grooming	Move away	Move closer	Reposition	Stop Behaviour	Travel with me
Arm raise		1	1		1	1
Arm swing		1	1		1		1
Beckon		1				1		1
Big Loud Scratch		1				1
Directed push		1	1								1
Embrace			1							1
Foot present
Grab		1	1			1	1		1	1
Grab-pull		1		1		1		1	1
Hand fling							1
Hand on	1		1	1		1		1		1
Mouth stroke	1
Object move					1
Object shake					1
Present (climb on)		1
Present (grooming)						1
Present (sexual)			1		1
Punch other							1			1
Push							1			1
Reach	1	1									1
Slap other										1
Touch other		1			1	1	1	1	1		1

## Sheet: Chimp matrix
	Acquire object/food	Climb on me	Contact	Follow me	Initiate copulation	Initiate grooming	Move away	Move closer	Reposition	Stop behaviour	Travel with me
Arm raise	1						1	1		1
Arm swing				1			1	1		1
Beckon								1
Big Loud Scratch						1					1
Directed push	1	1					1	1	1
Embrace			1
Foot present		1
Grab		1					1			1
Grab-pull		1						1		1
Hand fling							1			1
Hand on	1		1							1
Mouth stroke	1
Object move				1	1		1	1
Object shake	1			1	1	1	1	1		1
Present (climb on)		1
Present (grooming)						1
Present (sexual)	1		1		1	1
Punch other							1			1
Push							1			1
Reach	1	1	1		1			1
Slap other							1			1
Touch other	1	1	1			1		1		1
